# Supplementary material for: Rat Hepatic Stellate Cell Line CFSC-2G: Genetic Markers and Short Tandem Repeat Profile Useful for Cell Line Authentication
Source: MDPI journal article supplement (doi:10.3390/cells11182900), 2022-09-16
Supplement: s1 [file s1]

**Table S1.** Publications using or mentioning CFSC cells or clones derived thereof

| No. | Year | Reference                                                                                                                                                                                                                                                                                                                  | Clone                                    | Origin of publication |
|-----|------|----------------------------------------------------------------------------------------------------------------------------------------------------------------------------------------------------------------------------------------------------------------------------------------------------------------------------|------------------------------------------|-----------------------|
| 1   | 1991 | Greenwel P, Schwartz M, Rosas M, Peyrol S, Grimaud JA, Rojkind M. Characterization of fat-storing cell lines derived from normal and CCl <sub>4</sub> -cirrhotic livers. Differences in the production of interleukin-6. Lab Invest. 1991;65(6):644-53. PMID: 1753710                                                      | CFSC                                     | USA                   |
| 2   | 1993 | Ogata I, Sáez CG, Greenwel P, Ponce Mde L, Geerts A, Leinwand LA, Rojkind M. Rat liver fat-storing cell lines express sarcomeric myosin heavy chain mRNA and protein. Cell Motil Cytoskeleton 1993;26(2):125-32. doi: 10.1002/cm.970260204                                                                                 | CFSC-2G, CFSC-3H                         | USA                   |
| 3   | 1993 | Greenwel P, Rubin J, Schwartz M, Hertzberg EL, Rojkind M. Liver fat-storing cell clones obtained from a CCl <sub>4</sub> -cirrhotic rat are heterogeneous with regard to proliferation, expression of extracellular matrix components, interleukin-6, and connexin 43. Lab Invest. 1993;69(2):210-6. PMID: 8394478         | CFSC, CFSC-2G, CFSC-8B, CFSC-3H, CFSC-5H | USA                   |
| 4   | 1995 | Rojkind M, Novikoff PM, Greenwel P, Rubin J, Rojas-Valencia L, de Carvalho AC, Stockert R, Spray D, Hertzberg EL, Wolkoff AW. Characterization and functional studies on rat liver fat-storing cell line and freshly isolated hepatocyte coculture system. Am J Pathol. 1995;146(6):1508-20. PMID: 7778689                 | CFSC, CFSC-2G, CFSC-8B, CFSC-3H, CFSC-5H | USA                   |
| 5   | 1995 | Inagaki Y, Truter S, Greenwel P, Rojkind M, Unoura M, Kobayashi K, Ramirez F. Regulation of the alpha 2(I) collagen gene transcription in fat-storing cells derived from a cirrhotic liver. Hepatology 1995;22(2):573-9. PMID: 7635427                                                                                     | CFSC-2G, CFSC-5H                         | Japan                 |
| 6   | 1997 | Ogata I, Auster AS, Matsui A, Greenwel P, Geerts A, D'Amico T, Fujiwara K, Kessler E, Rojkind M. Up-regulation of type I procollagen C-proteinase enhancer protein messenger RNA in rats with CCl <sub>4</sub> -induced liver fibrosis. Hepatology 1997;26(3):611-7. doi: 10.1002/hep.510260312                            | CFSC, CFSC-2G, CFSC-8B, CFSC-3H, CFSC-5H | USA                   |
| 7   | 1997 | Fontana L, Jerez D, Rojas-Valencia L, Solís-Herruzo JA, Greenwel P, Rojkind M. Ethanol induces the expression of alpha 1(I) procollagen mRNA in a co-culture system containing a liver stellate cell-line and freshly isolated hepatocytes. Biochim Biophys Acta 1997;1362(2-3):135-44. doi: 10.1016/s0925-4439(97)00056-2 | CFSC-2G                                  | USA                   |
| 8   | 1998 | Okazaki I, Watanabe T, Hozawa S, Maruyama K. Molecular pathology of liver fibrosis. Prog Hepatol 1998;4:23-33.                                                                                                                                                                                                             | CFSC-2G, CFSC-5H                         | Japan                 |
| 9   | 1999 | Rodríguez-Fragoso L, Alvarez R, Reyes-Esparza JA, Garcés ME. Acetaldehyde increases the activity and gene expression of urokinase type plasminogen activator in a hepatic stellate cell line. Toxicology 1999;137(1):1-11. doi: 10.1016/s0300-483x(99)00064-5                                                              | CFSC-2G                                  | Mexico                |

|    |      |                                                                                                                                                                                                                                                                                                                         |            |                            |
|----|------|-------------------------------------------------------------------------------------------------------------------------------------------------------------------------------------------------------------------------------------------------------------------------------------------------------------------------|------------|----------------------------|
| 10 | 2000 | Vasiliou V, Lee J, Pappa A, Petersen DR. Involvement of p65 in the regulation of NF-kappaB in rat hepatic stellate cells during cirrhosis. <i>Biochem Biophys Res Commun.</i> 2000;273(2):546-50. doi: 10.1006/bbrc.2000.2993                                                                                           | NS (CFSC)  | USA                        |
| 11 | 2000 | Reichard JF, Vasiliou V, Petersen DR. Characterization of 4-hydroxy-2-nonenal metabolism in stellate cell lines derived from normal and cirrhotic rat liver. <i>Biochim Biophys Acta</i> 2000;1487(2-3):222-32. doi: 10.1016/s1388-1981(00)00095-0                                                                      | NS (CFSC?) | USA                        |
| 12 | 2001 | Gutiérrez-Ruiz MC, Bucio L, Correa A, Souza V, Hernández E, Gómez-Quiroz LE, Kershenobich D. Metadoxine prevents damage produced by ethanol and acetaldehyde in hepatocyte and hepatic stellate cells in culture. <i>Pharmacol Res.</i> 2001;44(5):431-6. doi: 10.1006/phrs.2001.0883                                   | CFSC-2G    | Mexico                     |
| 13 | 2001 | Quiroz SC, Bucio L, Souza V, Hernández E, González E, Gómez-Quiroz L, Kershenobich D, Vargas-Vorackova F, Gutiérrez-Ruiz MC. Effect of endotoxin pretreatment on hepatic stellate cell response to ethanol and acetaldehyde. <i>J Gastroenterol Hepatol.</i> 2001;16(11):1267-73. doi: 10.1046/j.1440-1746.2001.02619.x | CFSC-2G    | Mexico                     |
| 14 | 2001 | Inagaki Y, Nemoto T, Nakao A, Dijke Pt, Kobayashi K, Takehara K, Greenwel P. Interaction between GC box binding factors and Smad proteins modulates cell lineage-specific alpha 2(I) collagen gene transcription. <i>J Biol Chem.</i> 2001;276(19):16573-9. doi: 10.1074/jbc.M010485200                                 | CFSC-2G    | Japan/The Netherlands/ USA |
| 15 | 2001 | García-Tevijano ER, Berasain C, Rodríguez JA, Corrales FJ, Arias R, Martín-Duce A, Caballería J, Mato JM, Avila MA. Hyperhomocysteinemia in liver cirrhosis: mechanisms and role in vascular and hepatic fibrosis. <i>Hypertension</i> 2001;38(5):1217-21. doi: 10.1161/hy1101.099499                                   | CFSC-2G    | Spain                      |
| 16 | 2002 | del Carmen EM, Souza V, Bucio L, Hernández E, Damián-Matsumura P, Zaga V, Gutiérrez-Ruiz MC. Cadmium induces alpha(1)collagen (I) and metallothionein II gene and alters the antioxidant system in rat hepatic stellate cells. <i>Toxicology</i> 2002;170(1-2):63-73. doi: 10.1016/s0300-483x(01)00531-5                | CFSC-2G    | Mexico                     |
| 17 | 2002 | Freeman TL, Kharbanda KK, Tuma DJ, Mailliard ME. Inhibition of hepatic stellate cell collagen synthesis by N-(methylamino)isobutyric acid. <i>Biochem Pharmacol.</i> 2002;63(4):697-706. doi: 10.1016/s0006-2952(01)00885-1                                                                                             | CFSC-2G    | USA                        |
| 18 | 2002 | Hernández E, Correa A, Bucio L, Souza V, Kershenobich D, Gutiérrez-Ruiz MC. Pentoxifylline diminished acetaldehyde-induced collagen production in hepatic stellate cells by decreasing interleukin-6 expression. <i>Pharmacol Res.</i> 2002;46(5):435-43. doi: 10.1016/s1043661802002025                                | CFSC-2G    | Mexico                     |
| 19 | 2002 | Zhang XL, Liu L, Jiang HQ. Salvia miltiorrhiza monomer IH764-3 induces hepatic stellate cell apoptosis via caspase-3 activation. <i>World J Gastroenterol.</i> 2002;8(3):515-9. doi: 10.3748/wjg.v8.i3.515                                                                                                              | CFSC       | China                      |
| 20 | 2003 | Vasiliou V, Qamar L, Pappa A, Sophos NA, Petersen DR. Involvement of the electrophile responsive element and p53 in the activation of hepatic stellate cells as a response to electrophile menadione. <i>Arch Biochem Biophys.</i> 2003;413(2):164-71. doi: 10.1016/s0003-9861(03)00095-x                               | NS (CFSC)  | USA                        |
| 21 | 2003 | Arnaud A, Fontana L, Angulo AJ, Gil A, López-Pedrosa JM. Proliferation, functionality, and extracellular                                                                                                                                                                                                                | CFSC-2G    | Spain                      |

|     |      |                                                                                                                                                                                                                                                                                                                                         |                                          |             |
|-----|------|-----------------------------------------------------------------------------------------------------------------------------------------------------------------------------------------------------------------------------------------------------------------------------------------------------------------------------------------|------------------------------------------|-------------|
|     |      | matrix production of hepatocytes and a liver stellate cell line: a comparison between single cultures and cocultures. Dig Dis Sci. 2003;48(7):1406-13. doi: 10.1023/a:1024192100775                                                                                                                                                     |                                          |             |
| 22  | 2003 | Arnaud A, Fontana L, Angulo AJ, Gil A, López-Pedrosa JM. Exogenous nucleosides alter the intracellular nucleotide pool in hepatic cell cultures. Implications in cell proliferation and function. Clin Nutr. 2003;22(4):391-9. doi: 10.1016/s0261-5614(03)00037-2                                                                       | CFSC-2G                                  | Spain       |
| 23  | 2003 | Westhoff JH, Sawitza I, Keski-Oja J, Gressner AM, Breitkopf K. PDGF-BB induces expression of LTBP-1 but not TGF-beta1 in a rat cirrhotic fat storing cell line. Growth Factors 2003;21(3-4):121-30. doi: 10.1080/08977190310001637224                                                                                                   | NS (CFSC)                                | Germany     |
| 24  | 2003 | Schaefer B, Rivas-Estilla AM, Meraz-Cruz N, Reyes-Romero MA, Hernández-Nazara ZH, Domínguez-Rosales JA, Schuppan D, Greenwel P, Rojkind M. Reciprocal modulation of matrix metalloproteinase-13 and type I collagen genes in rat hepatic stellate cells. Am J Pathol. 2003;162(6):1771-80. doi: 10.1016/S0002-9440(10)64312-X           | CFSC, CFSC-2G, CFSC-3H, CFSC-5H, CFSC-8B | Germany/USA |
| 25  | 2004 | Inagaki Y, Nemoto T, Nakao A. Transcriptional activation of type I collagen gene during hepatic fibrogenesis. In: Extracellular matrix and the liver: Approach to Gene therapy. (Eds. Isao Okazaki, Yosifumi Ninomiya, Scott L. Friedman, and Kyuichi Tanikawa). Academic Press 2003, pp. 233-48. doi: 10.1016/B978-012525251-5/50014-2 | CFSC-2G, CFSC-5H                         | Japan       |
| 26  | 2004 | Arnaud A, Fontana L, Sáez-Lara MJ, Gil A, López-Pedrosa JM. Exogenous nucleosides modulate the expression of rat liver extracellular matrix genes in single cultures of primary hepatocytes and a liver stellate cell line and in their co-culture. Clin Nutr. 2004;23(1):43-51. doi: 10.1016/s0261-5614(03)00087-6                     | CFSC-2G                                  | USA/Spain   |
| 27* | 2004 | Xu XB, Leng XS, He ZP, Liang ZQ, Lin K, Yu X, Wei YH. [Effects of anti-sense Smad4 gene on the biological characteristics of the fat-storing cell line CFSC]. Zhonghua Yi Xue Za Zhi. 2004;84(7):587-91. PMID: 15144596                                                                                                                 | NS (CFSC?)                               | China       |
| 28  | 2004 | Souza V, Escobar Mdel C, Bucio L, Hernández E, Gutiérrez-Ruiz MC. Zinc pretreatment prevents hepatic stellate cells from cadmium-produced oxidative damage. Cell Biol Toxicol. 2004;20(4):241-51. doi: 10.1023/b:cbto.0000038462.39859.2f                                                                                               | CFSC-2G                                  | Mexico      |
| 29  | 2004 | Freeman TL, Thiele GM, Klassen LW, Klassen BT, Mailliard ME. N-(methylamino)isobutyric acid inhibits proliferation of CFSC-2C hepatic stellate cells. Biochem Pharmacol. 2004;68(2):223-30. doi: 10.1016/j.bcp.2004.03.012                                                                                                              | CFSC-2G**                                | USA         |
| 30  | 2004 | Bolkenius U, Hahn D, Gressner AM, Breitkopf K, Dooley S, Wickert L. Glucocorticoids decrease the bioavailability of TGF-beta which leads to a reduced TGF-beta signaling in hepatic stellate cells. Biochem Biophys Res Commun. 2004;325(4):1264-70. doi: 10.1016/j.bbrc.2004.10.164                                                    | NS (CFSC?)                               | Germany     |
| 31  | 2004 | Wang YF, Nan X, Zhang R, Li YH, Yue W, Yan F, Pei XT. Differentiation of bone marrow derived Thy-1(+)beta M-2(-) cells into hepatocytes induced by coculture with transgenic CFSCs. Chin Sci Bull 2004;49:889-94. doi: 10.1007/BF03184005                                                                                               | NS (CFSC?)                               | China       |

|     |      |                                                                                                                                                                                                                                                                                                                         |            |                   |
|-----|------|-------------------------------------------------------------------------------------------------------------------------------------------------------------------------------------------------------------------------------------------------------------------------------------------------------------------------|------------|-------------------|
| 32* | 2005 | Wang YF, Nan X, Li YH, Zhang R, Yue W, Yan F, Pei XT. [Sustaining effect of gene-transferring hepatic stellate cell strain CFSC/HGF on hepatocytes development]. <i>Zhonghua Gan Zang Bing Za Zhi</i> . 2005;13(1):45-8. PMID: 15670492                                                                                 | NS (CSFC?) | China             |
| 33  | 2005 | Wang Y, Nan X, Li Y, Zhang R, Yue W, Yan F, Pei X. Induction of umbilical cord blood-derived beta2m-c-Met+ cells into hepatocyte-like cells by coculture with CFSC/HGF cells. <i>Liver Transpl</i> . 2005;11(6):635-43. doi: 10.1002/lt.20419                                                                           | NS (CFSC?) | China             |
| 34* | 2005 | Wang YF, Xue YL, Nan X, Liang F, Luo Y, Li YL, Gao YH, Yue W, Pei XT. [Sustainment of hepatocyte function with mixed cellular co-encapsulation]. <i>Zhonghua Yi Xue Za Zhi</i> . 2005;85(35):2481-6. PMID: 16321274                                                                                                     | NS (CFSC?) | China             |
| 35  | 2005 | Schulze-Krebs A, Preimel D, Popov Y, Bartenschlager R, Lohmann V, Pinzani M, Schuppan D. Hepatitis C virus-replicating hepatocytes induce fibrogenic activation of hepatic stellate cells. <i>Gastroenterology</i> 2005;129(1):246-58. doi: 10.1053/j.gastro.2005.03.089                                                | CFSC-2G    | Germany/USA/Italy |
| 36  | 2006 | Dooley S, Said HM, Gressner AM, Floege J, En-Nia A, Mertens PR. Y-box protein-1 is the crucial mediator of antifibrotic interferon-gamma effects. <i>J Biol Chem</i> . 2006;281(3):1784-95. doi: 10.1074/jbc.M510215200                                                                                                 | CFSC-2G    | Germany           |
| 37  | 2007 | de Villiers WJ, Song Z, Nasser MS, Deaciuc IV, McClain CJ. 4-Hydroxynonenal-induced apoptosis in rat hepatic stellate cells: mechanistic approach. <i>J Gastroenterol Hepatol</i> . 2007;22(3):414-22. doi: 10.1111/j.1440-1746.2006.04625.x                                                                            | CFSC-2G    | USA               |
| 38  | 2007 | Sun Y, Fan J, Shen H, Li P, Cattini P, Gong Y. Cloning and promoter activity of rat Smad1 5'-flanking region in rat hepatic stellate cells. <i>Mol Cell Biochem</i> . 2007;304(1-2):227-34. doi: 10.1007/s11010-007-9504-8                                                                                              | CFSC-8B    | Canada/China      |
| 39  | 2007 | Shen H, Fan J, Burczynski F, Minuk GY, Cattini P, Gong Y. Increased Smad1 expression and transcriptional activity enhances trans-differentiation of hepatic stellate cells. <i>J Cell Physiol</i> . 2007;212(3):764-70. doi: 10.1002/jcp.21074                                                                          | CFSC-8B    | Canada/China      |
| 40* | 2007 | Shi LJ, Li SX, Sun B, Wang JH, Li HL, Jin LH. [Effects of bone marrow mesenchymal stem cells on the proliferation of hepatocytes and cirrhotic fat-storing cells in vitro]. <i>Zhonghua Gan Zang Bing Za Zhi</i> . 2007;15(9):681-4. PMID: 17903371                                                                     | NS (CFSC)  | China             |
| 41  | 2007 | Herrmann J, Gressner AM, Weiskirchen R. Immortal hepatic stellate cell lines: useful tools to study hepatic stellate cell biology and function? <i>J Cell Mol Med</i> . 2007;11(4):704-22. doi: 10.1111/j.1582-4934.2007.00060.x                                                                                        | CFSC-2G    | Germany           |
| 42  | 2008 | Hernández E, Bucio L, Souza V, Escobar MC, Gómez-Quiroz LE, Farfán B, Kershenovich D, Gutiérrez-Ruiz MC. Pentoxifylline downregulates alpha (I) collagen expression by the inhibition of IkappaBalpha degradation in liver stellate cells. <i>Cell Biol Toxicol</i> . 2008;24(4):303-14. doi: 10.1007/s10565-007-9039-5 | CFSC-2G    | Mexico            |
| 43  | 2008 | Inagaki Y, Higashi K, Kushida M, Hong YY, Nakao S, Higashiyama R, Moro T, Itoh J, Mikami T, Kimura T, Shiota G, Kuwabara I, Okazaki I. Hepatocyte growth factor suppresses profibrogenic signal                                                                                                                         | CFSC-2G    | Japan/USA         |

|    |      |                                                                                                                                                                                                                                                                                                                                                                                 |                     |            |
|----|------|---------------------------------------------------------------------------------------------------------------------------------------------------------------------------------------------------------------------------------------------------------------------------------------------------------------------------------------------------------------------------------|---------------------|------------|
|    |      | transduction via nuclear export of Smad3 with galectin-7. <i>Gastroenterology</i> 2008;134(4):1180-90. doi: 10.1053/j.gastro.2008.01.014                                                                                                                                                                                                                                        |                     |            |
| 44 | 2008 | Ohayon O, Mawasi N, Pevzner A, Tryvitz A, Gildor T, Pines M, Rojkind M, Paizi M, Spira G. Halofuginone upregulates the expression of heparanase in thioacetamide-induced liver fibrosis in rats. <i>Lab Invest.</i> 2008;88(6):627-33. doi: 10.1038/labinvest.2008.30                                                                                                           | CFSC-3H,<br>CFSC-8B | Israel/USA |
| 45 | 2008 | Camino AM, Atorrasagasti C, Maccio D, Prada F, Salvatierra E, Rizzo M, Alaniz L, Aquino JB, Podhajcer OL, Silva M, Mazzolini G. Adenovirus-mediated inhibition of SPARC attenuates liver fibrosis in rats. <i>J Gene Med.</i> 2008;10(9):993-1004. doi: 10.1002/jgm.1228                                                                                                        | CFSC-2G             | Argentina  |
| 46 | 2008 | Maubach G, Lim MC, Zhuo L. Nuclear cathepsin F regulates activation markers in rat hepatic stellate cells. <i>Mol Biol Cell.</i> 2008;19(10):4238-48. doi: 10.1091/mbc.e08-03-0291                                                                                                                                                                                              | CFSC-8B             | Singapore  |
| 47 | 2009 | Sun X, Zhang XD, Cheng G, Hu YH, Wang HY. Inhibition of hepatic stellate cell proliferation by heat shock protein 90 inhibitors in vitro. <i>Mol Cell Biochem.</i> 2009;330(1-2):181-5. doi: 10.1007/s11010-009-0131-4                                                                                                                                                          | NS (CFSC<br>clone?) | China      |
| 48 | 2009 | Sun X, Zhang X, Hu H, Lu Y, Chen J, Yasuda K, Wang H. Berberine inhibits hepatic stellate cell proliferation and prevents experimental liver fibrosis. <i>Biol Pharm Bull.</i> 2009;32(9):1533-7. doi: 10.1248/bpb.32.1533                                                                                                                                                      | NS (CFSC?)          | China      |
| 49 | 2009 | Szuster-Ciesielska A, Plewka K, Daniluk J, Kandefer-Szerszeń M. Zinc supplementation attenuates ethanol- and acetaldehyde-induced liver stellate cell activation by inhibiting reactive oxygen species (ROS) production and by influencing intracellular signaling. <i>Biochem Pharmacol.</i> 2009;78(3):301-14. doi: 10.1016/j.bcp.2009.04.009                                 | CFSC-2G             | Poland     |
| 50 | 2009 | Ruehl M, Erben U, Kim K, Freise C, Dagdelen T, Eisele S, Trowitzsch-Kienast W, Zeitz M, Jia J, Stickel F, Somasundaram R. Extracts of <i>Lindera obtusiloba</i> induce antifibrotic effects in hepatic stellate cells via suppression of a TGF-beta-mediated profibrotic gene expression pattern. <i>J Nutr Biochem.</i> 2009;20(8):597-606. doi: 10.1016/j.jnutbio.2008.06.003 | CFSC-2G             | Germany    |
| 51 | 2009 | Enami Y, Bandi S, Kapoor S, Krohn N, Joseph B, Gupta S. Hepatic stellate cells promote hepatocyte engraftment in rat liver after prostaglandin-endoperoxide synthase inhibition. <i>Gastroenterology</i> 2009;136(7):2356-64. doi: 10.1053/j.gastro.2009.03.003                                                                                                                 | CFSC-8B             | Japan/USA  |
| 52 | 2010 | González-Puertos VY, Hernández-Pérez E, Nuño-Lámbarri N, Ventura-Gallegos JL, López-Díazguerrero NE, Robles-Díaz G, Gutiérrez-Ruiz MC, Konigsberg M. Bcl-2 overexpression in hepatic stellate cell line CFSC-2G, induces a pro-fibrotic state. <i>J Gastroenterol Hepatol.</i> 2010;25(7):1306-14. doi: 10.1111/j.1440-1746.2009.06175.x                                        | CFSC-2G             | Mexico     |
| 53 | 2010 | Ye Y, Dan Z. All-trans retinoic acid diminishes collagen production in a hepatic stellate cell line via suppression of active protein-1 and c-Jun N-terminal kinase signal. <i>J Huazhong Univ Sci Technolog Med Sci.</i> 2010;30(6):726-33. doi: 10.1007/s11596-010-0648-5                                                                                                     | CFSC-2G             | China      |

|    |      |                                                                                                                                                                                                                                                                                                                                                                   |                                             |                  |
|----|------|-------------------------------------------------------------------------------------------------------------------------------------------------------------------------------------------------------------------------------------------------------------------------------------------------------------------------------------------------------------------|---------------------------------------------|------------------|
| 54 | 2011 | Atorrasagasti C, Aquino JB, Hofman L, Alaniz L, Malvicini M, Garcia M, Benedetti L, Friedman SL, Podhajcer O, Mazzolini G. SPARC downregulation attenuates the profibrogenic response of hepatic stellate cells induced by TGF- $\beta$ 1 and PDGF. <i>Am J Physiol Gastrointest Liver Physiol</i> . 2011;300(5):G739-48. doi: 10.1152/ajpgi.00316.2010           | CFSC-2G                                     | Argentina/USA    |
| 55 | 2011 | Kastanis GJ, Hernandez-Nazara Z, Nieto N, Rincón-Sánchez AR, Popratiloff A, Dominguez-Rosales JA, Lechuga CG, Rojkind M. The role of dystroglycan in PDGF-BB-dependent migration of activated hepatic stellate cells/myofibroblasts. <i>Am J Physiol Gastrointest Liver Physiol</i> . 2011;301(3):G464-74. doi: 10.1152/ajpgi.00078.2011                          | CFSC-2G,<br>CFSC-8B                         | USA/Mexico/Spain |
| 56 | 2011 | Mòdol T, Natal C, Pérez de Obanos MP, Domingo de Miguel E, Iraburu MJ, López-Zabalza MJ. Apoptosis of hepatic stellate cells mediated by specific protein nitration. <i>Biochem Pharmacol</i> . 2011;81(3):451-8. doi: 10.1016/j.bcp.2010.10.017                                                                                                                  | CFSC-2G                                     | Spain            |
| 57 | 2012 | Borkham-Kamphorst E, van Roeyen CR, Van de Leur E, Floege J, Weiskirchen R. CCN3/NOV small interfering RNA enhances fibrogenic gene expression in primary hepatic stellate cells and cirrhotic fat storing cell line CFSC. <i>J Cell Commun Signal</i> . 2012;6(1):11-25. doi: 10.1007/s12079-011-0141-3                                                          | CFSC(-2G)                                   | Germany          |
| 58 | 2012 | Fan J, Shen H, Dai Q, Burzynski FJ, Minuk GY, Gong Y. Extent of extracellular signal-regulated kinases phosphorylation determines the sensitivity of hepatic stellate cells to staurosporine-induced apoptosis. <i>Zhong Nan Da Xue Xue Bao Yi Xue Ban</i> . 2012;37(1):11-6. doi: 10.3969/j.issn.1672-7347.2012.01.003                                           | CFSC-8B,<br>CFSC-2G,<br>CFSC-3H,<br>CFSC-5H | Canada/China     |
| 59 | 2012 | Lim JY, Oh MA, Kim WH, Sohn HY, Park SI. AMP-activated protein kinase inhibits TGF- $\beta$ -induced fibrogenic responses of hepatic stellate cells by targeting transcriptional coactivator p300. <i>J Cell Physiol</i> . 2012;227(3):1081-9. doi: 10.1002/jcp.22824                                                                                             | CFSC-2G                                     | Korea            |
| 60 | 2012 | Piccioni F, Malvicini M, Garcia MG, Rodriguez A, Atorrasagasti C, Kippes N, Piedra Buena IT, Rizzo MM, Bayo J, Aquino J, Viola M, Passi A, Alaniz L, Mazzolini G. Antitumor effects of hyaluronic acid inhibitor 4-methylumbelliferone in an orthotopic hepatocellular carcinoma model in mice. <i>Glycobiology</i> 2012;22(3):400-10. doi: 10.1093/glycob/cwr158 | CFSC-2G                                     | Argentina/Italy  |
| 61 | 2012 | Boaru SG, Borkham-Kamphorst E, Tihaa L, Haas U, Weiskirchen R. Expression analysis of inflammasomes in experimental models of inflammatory and fibrotic liver disease. <i>J Inflamm (Lond)</i> . 2012;9(1):49. doi: 10.1186/1476-9255-9-49                                                                                                                        | CFSC-2G                                     | Germany          |
| 62 | 2012 | Madsen DH, Jørgensen HJ, Ingvarsen S, Melander MC, Vainer B, Egerod KL, Hald A, Rønø B, Madsen CA, Bugge TH, Engelholm LH, Behrendt N. Endocytic collagen degradation: a novel mechanism involved in protection against liver fibrosis. <i>J Pathol</i> . 2012;227(1):94-105. doi: 10.1002/path.3981                                                              | CFSC-2G                                     | Denmark/USA      |
| 63 | 2012 | Zong L, Qu Y, Xu My, Dong Yw, Lu Lg. 18 $\alpha$ -Glycyrrhetic acid down-regulates expression of type I and III collagen via TGF-B1/Smad signaling pathway in human and rat hepatic stellate cells. <i>Int J Med Sci</i> 2012; 9(5):370-9. doi:10.7150/ijms.4395                                                                                                  | CFSC                                        | China            |

|    |      |                                                                                                                                                                                                                                                                                                                                                                               |         |                               |
|----|------|-------------------------------------------------------------------------------------------------------------------------------------------------------------------------------------------------------------------------------------------------------------------------------------------------------------------------------------------------------------------------------|---------|-------------------------------|
| 64 | 2013 | Peng Y, Yang H, Zhu T, Zhao M, Deng Y, Liu B, Shen H, Hu G, Wang Z, Tao L. The antihepatic fibrotic effects of fluorofenidone via MAPK signalling pathways. <i>Eur J Clin Invest.</i> 2013;43(4):358-68. doi: 10.1111/eci.12053                                                                                                                                               | CFSC-2G | China                         |
| 65 | 2013 | von Schönfels W, von Kampen O, Patsenker E, Stickel F, Schniewind B, Hinz S, Ahrens M, Balschun K, Egberts JH, Richter K, Landrock A, Sipos B, Will O, Huebbe P, Schreiber S, Nothnagel M, Röcken C, Rimbach G, Becker T, Hampe J, Schafmayer C. Metabolic signature of electrosurgical liver dissection. <i>PLoS One</i> 2013;8(9):e72022. doi: 10.1371/journal.pone.0072022 | CFSC-2G | Germany/Switzerland           |
| 66 | 2013 | Meurer SK, Alsamman M, Sahin H, Wasmuth HE, Kisseleva T, Brenner DA, Trautwein C, Weiskirchen R, Scholten D. Overexpression of endoglin modulates TGF- $\beta$ 1-signalling pathways in a novel immortalized mouse hepatic stellate cell line. <i>PLoS One</i> 2013;8(2):e56116. doi: 10.1371/journal.pone.0056116                                                            | CFSC-2G | Germany/USA                   |
| 67 | 2013 | Szuster-Ciesielska A, Mizerska-Dudka M, Daniluk J, Kandefer-Szerszeń M. Butein inhibits ethanol-induced activation of liver stellate cells through TGF- $\beta$ , NF $\kappa$ B, p38, and JNK signaling pathways and inhibition of oxidative stress. <i>J Gastroenterol.</i> 2013;48(2):222-37. doi: 10.1007/s00535-012-0619-7                                                | CFSC-2G | Poland                        |
| 68 | 2013 | Calleja MA, Vieites JM, Montero-Meléndez T, Torres MI, Faus MJ, Gil A, Suárez A. The antioxidant effect of $\beta$ -caryophyllene protects rat liver from carbon tetrachloride-induced fibrosis by inhibiting hepatic stellate cell activation. <i>Br J Nutr.</i> 2013;109(3):394-401. doi: 10.1017/S0007114512001298                                                         | CFSC-2G | Spain/UK                      |
| 69 | 2013 | Liu Y, Liu H, Meyer C, Li J, Nadalin S, Königsrainer A, Weng H, Dooley S, Ten Dijke P. Transforming growth factor- $\beta$ (TGF- $\beta$ )-mediated connective tissue growth factor (CTGF) expression in hepatic stellate cells requires Stat3 signaling activation. <i>J Biol Chem.</i> 2013;288(42):30708-19. doi: 10.1074/jbc.M113.478685                                  | CFSC-2G | Germany/The Netherlands/China |
| 70 | 2014 | Bahde R, Kapoor S, Gupta S. Nonselective inhibition of prostaglandin-endoperoxide synthases by naproxen ameliorates acute or chronic liver injury in animals. <i>Exp Mol Pathol.</i> 2014;96(1):27-35. doi: 10.1016/j.yexmp.2013.10.017                                                                                                                                       | CFSC-8B | Germany/USA                   |
| 71 | 2014 | Geng Y, Wang J, Xie M, Lu Z, Xu H, Shi JS, Xu ZH. Screening and isolation for anti-hepatofibrotic components from medicinal mushrooms using TGF- $\beta$ 1-induced liver fibrosis in hepatic stellate cells. <i>Int J Med Mushrooms</i> 2014;16(6):529-39. doi: 10.1615/intjmedmushrooms.v16.i6.30                                                                            | CFSC-8B | China                         |
| 72 | 2014 | Bahde R, Kapoor S, Viswanathan P, Spiegel HU, Gupta S. Endothelin-1 receptor A blocker darusentan decreases hepatic changes and improves liver repopulation after cell transplantation in rats. <i>Hepatology</i> 2014;59(3):1107-17. doi: 10.1002/hep.26766                                                                                                                  | CFSC-8B | Germany/USA                   |
| 73 | 2014 | Duval F, Moreno-Cuevas JE, González-Garza MT, Rodríguez-Montalvo C, Cruz-Vega DE. Liver fibrosis and protection mechanisms action of medicinal plants targeting apoptosis of hepatocytes and hepatic stellate cells. <i>Adv Pharmacol Sci.</i> 2014;2014:373295. doi: 10.1155/2014/373295                                                                                     | CFSC    | Mexico                        |
| 74 | 2014 | Li J, Pan Y, Kan M, Xiao X, Wang Y, Guan F, Zhang X, Chen L. Hepatoprotective effects of berberine on liver fibrosis via activation of AMP-activated protein kinase. <i>Life Sci.</i> 2014;98(1):24-30. doi:                                                                                                                                                                  | CFSC-2G | China                         |

|    |      |                                                                                                                                                                                                                                                                                                                             |            |             |
|----|------|-----------------------------------------------------------------------------------------------------------------------------------------------------------------------------------------------------------------------------------------------------------------------------------------------------------------------------|------------|-------------|
|    |      | 10.1016/j.lfs.2013.12.211                                                                                                                                                                                                                                                                                                   |            |             |
| 75 | 2015 | Wang X, Zhao W, Wang J, Shi K, Qin X, Kong Q, Wang G, Mu L, Li H, Sun B, Shi L. Bone marrow stromal cells inhibit the activation of liver cirrhotic fat-storing cells via adrenomedullin secretion. Dig Dis Sci. 2015;60(5):1325-34. doi: 10.1007/s10620-014-3423-9                                                         | NS (CFSC?) | China       |
| 76 | 2015 | Chen L, Li L, Chen J, Li L, Zheng Z, Ren J, Qiu Y. Oleoylethanolamide, an endogenous PPAR- $\alpha$ ligand, attenuates liver fibrosis targeting hepatic stellate cells. Oncotarget 2015;6(40):42530-40. doi: 10.18632/oncotarget.6466                                                                                       | CFSC       | China/USA   |
| 77 | 2016 | Geng Y, Wang J, Sun Q, Xie M, Lu ZM, Xu HY, Shi JS, Xu ZH. Identification of Antrodin B from <i>Antrodia camphorata</i> as a new anti-hepatofibrotic compound using a rapid cell screening method and biological evaluation. Hepatol Res. 2016;46(3):E15-25. doi: 10.1111/hepr.12516                                        | CFSC-8B    | China       |
| 78 | 2016 | Borkham-Kamphorst E, Steffen BT, Van de Leur E, Haas U, Tihaa L, Friedman SL, Weiskirchen R. CCN1/CYR61 overexpression in hepatic stellate cells induces ER stress-related apoptosis. Cell Signal 2016;28(1):34-42. doi: 10.1016/j.cellsig.2015.10.013                                                                      | CFSC-2G    | Germany/USA |
| 79 | 2016 | Fiore E, Malvicini M, Bayo J, Peixoto E, Atorrasagasti C, Sierra R, Rodríguez M, Gómez Bustillo S, García MG, Aquino JB, Mazzolini G. Involvement of hepatic macrophages in the antifibrotic effect of IGF-I-overexpressing mesenchymal stromal cells. Stem Cell Res Ther. 2016;7(1):172. doi: 10.1186/s13287-016-0424-y    | CFSC-2G    | Argentina   |
| 80 | 2016 | Wang X, Wu X, Zhang A, Wang S, Hu C, Chen W, Shen Y, Tan R, Sun Y, Xu Q. Targeting the PDGF-B/PDGFR- $\beta$ interface with Destruxin A5 to selectively block PDGF-BB/PDGFR- $\beta\beta$ signaling and attenuate liver fibrosis. EBioMedicine 2016;7:146-56. doi: 10.1016/j.ebiom.2016.03.042                              | CFSC-8B    | China       |
| 81 | 2017 | Geng Y, Sun Q, Li W, Lu ZM, Xu HY, Shi JS, Xu ZH. The common dietary flavonoid myricetin attenuates liver fibrosis in carbon tetrachloride treated mice. Mol Nutr Food Res. 2017;61(4). doi: 10.1002/mnfr.201600392                                                                                                         | CFSC-8B    | China       |
| 82 | 2017 | Labine M, Gong Y, Minuk GY. Long-term, low-dose exposure to microcystin-LR does not cause or increase the severity of liver disease in rodents. Ann Hepatol 2017; 16: 959-65. doi:10.5604/01.3001.0010.5288                                                                                                                 | CFSC-2G    | Canada      |
| 83 | 2017 | Qiu SS, He Y, Li SL, Peng Y, Yang CY, Peng XQ, Gan QX, Zheng LF, Zhang J, Yang HX, Tao LJ. Peroxiredoxin-1 attenuates hepatic fibrosis by inhibiting TGF-beta 1/Smad3 and ROS signal pathways. Int J Clin Exp Med 2017;10:8896-8906. ISSN:1940-5901/IJCEM0050241                                                            | CFSC-2G    | China       |
| 84 | 2019 | Chen H, Gan Q, Yang C, Peng X, Qin J, Qiu S, Jiang Y, Tu S, He Y, Li S, Yang H, Tao L, Peng Y. A novel role of glutathione S-transferase A3 in inhibiting hepatic stellate cell activation and rat hepatic fibrosis. J Transl Med. 2019;17(1):280. doi: 10.1186/s12967-019-2027-8 Erratum in: J Transl Med. 2020;18(1):182. | CFSC-2G    | China       |
| 85 | 2019 | Zhang AH, Jiang N, Wang XQ, Tan RX. Galewone, an anti-fibrotic polyketide from <i>Daldinia eschscholzii</i> with an undescribed carbon skeleton. Sci Rep. 2019;9(1):14316. doi: 10.1038/s41598-019-50868-9                                                                                                                  | CFSC-8B    | China       |



|    |      |                                                                                                                                                                                                                                                                                                                                                          |                     |                            |
|----|------|----------------------------------------------------------------------------------------------------------------------------------------------------------------------------------------------------------------------------------------------------------------------------------------------------------------------------------------------------------|---------------------|----------------------------|
| 86 | 2020 | Wang X, Gao Y, Li Y, Huang Y, Zhu Y, Lv W, Wang R, Gou L, Cheng C, Feng Z, Xie J, Tian J, Yao R. Roseotoxin B alleviates cholestatic liver fibrosis through inhibiting PDGF-B/PDGFR- $\beta$ pathway in hepatic stellate cells. <i>Cell Death Dis.</i> 2020;11(6):458. doi: 10.1038/s41419-020-2575-0                                                    | CFSC-8B             | China                      |
| 87 | 2020 | Wang X. Study on the effects and mechanism of matrine on proliferation and collagen synthesis of hepatic stellate cells CFSC-8B activated by acetaldehyde. <i>China Pharmacy</i> 2020;12:1353-8.                                                                                                                                                         | CFSC-8B             | China                      |
| 88 | 2021 | Freise C, Lee H, Chronowski C, Chan D, Cziomer J, Rühl M, Dagdelen T, Lösekann M, Erben U, Catic A, Tegge W, Schuppan D, Somasundaram R, Sahin E. Alpha-single chains of collagen type VI inhibit the fibrogenic effects of triple helical collagen VI in hepatic stellate cells. <i>PLoS One</i> 2021;16(9):e0254557. doi: 10.1371/journal.pone.0254557 | CFSC                | Germany/USA                |
| 89 | 2022 | Weiz G, Molejon MI, Malvicini M, Sukowati CHC, Tiribelli C, Mazzolini G, Breccia JD. Glycosylated 4-methylumbelliferone as a targeted therapy for hepatocellular carcinoma. <i>Liver Int.</i> 2022;42(2):444-57. doi: 10.1111/liv.15084                                                                                                                  | CFSC-2G             | Argentina/Italy            |
| 90 | 2022 | Xu XY, Geng Y, Xu HX, Ren Y, Liu DY, Mao Y. <i>Antrodia camphorata</i> -derived Antrodin C inhibits liver fibrosis by blocking TGF-Beta and PDGF signaling pathways. <i>Front Mol Biosci.</i> 2022;9:835508. doi: 10.3389/fmolb.2022.835508                                                                                                              | CFSC-8B             | China                      |
| 91 | 2022 | Tanaka T, Moriya K, Tsunenaga M, Yanagawa T, Morita H, Minowa T, Tagawa YI, Hanagata N, Inagaki Y, Ikoma T. Visualized procollagen I $\alpha$ 1 demonstrates the intracellular processing of propeptides. <i>Life Sci Alliance</i> 2022;5(5):e202101060. doi: 10.26508/lsa.202101060                                                                     | CFSC-2G,<br>CFSC-5H | Japan                      |
| 92 | 2022 | Schröder SK, Schüler HM, Petersen KV, Tesauro C, Knudsen BR, Pedersen FS, Krus F, Buhl EM, Roeb E, Roderfeld M, Borojevic R, Almeida JL, Weiskirchen R. Genetic and molecular characterization of the immortalized murine hepatic stellate cell line GRX. <i>Cells</i> 2022;11(9):1504. doi: 10.3390/cells11091504                                       | CFSC-2G             | Germany/Denmark/Brazil/USA |

\* Article written in Chinese; \*\* Supposed error (i.e., CFSC-2C) in title or publication.
