# Supplementary figures and images for: Rat Hepatic Stellate Cell Line CFSC-2G: Genetic Markers and Short Tandem Repeat Profile Useful for Cell Line Authentication
Source: MDPI journal article supplement (doi:10.3390/cells11182900), 2022-09-16

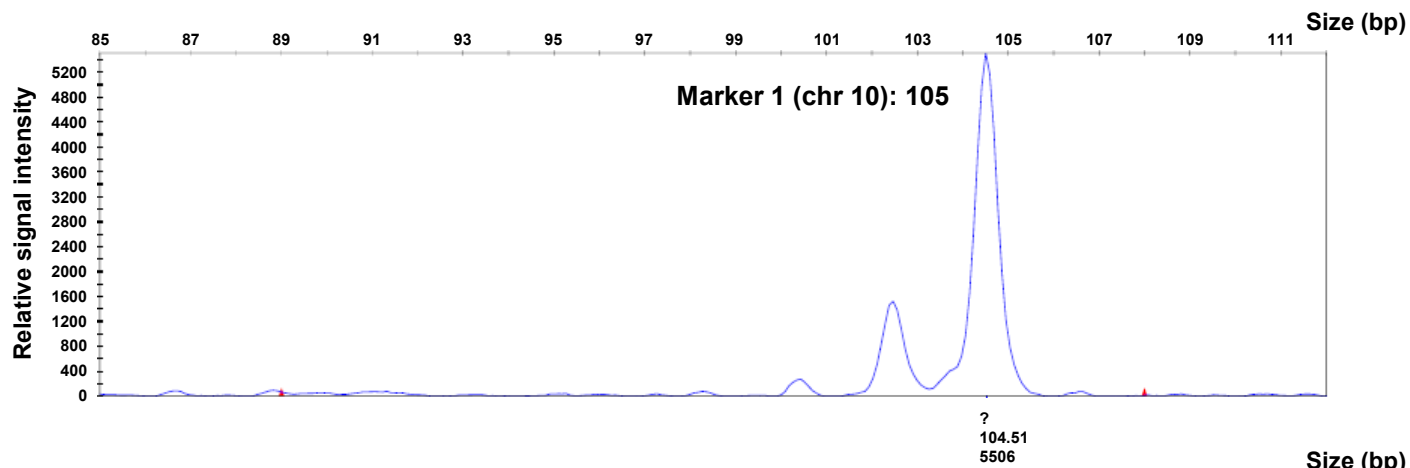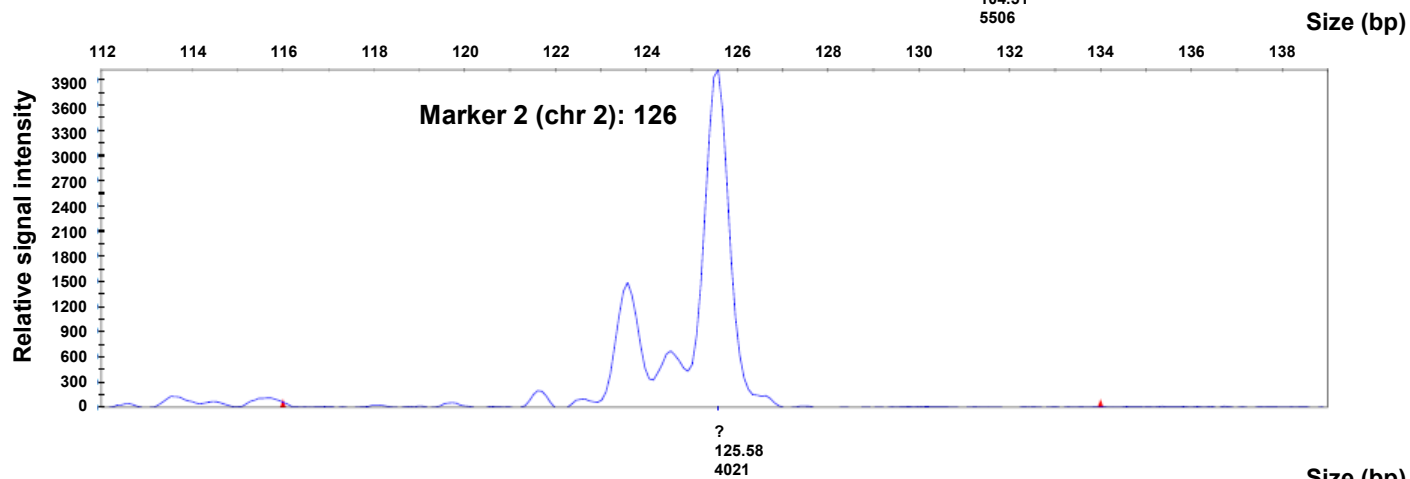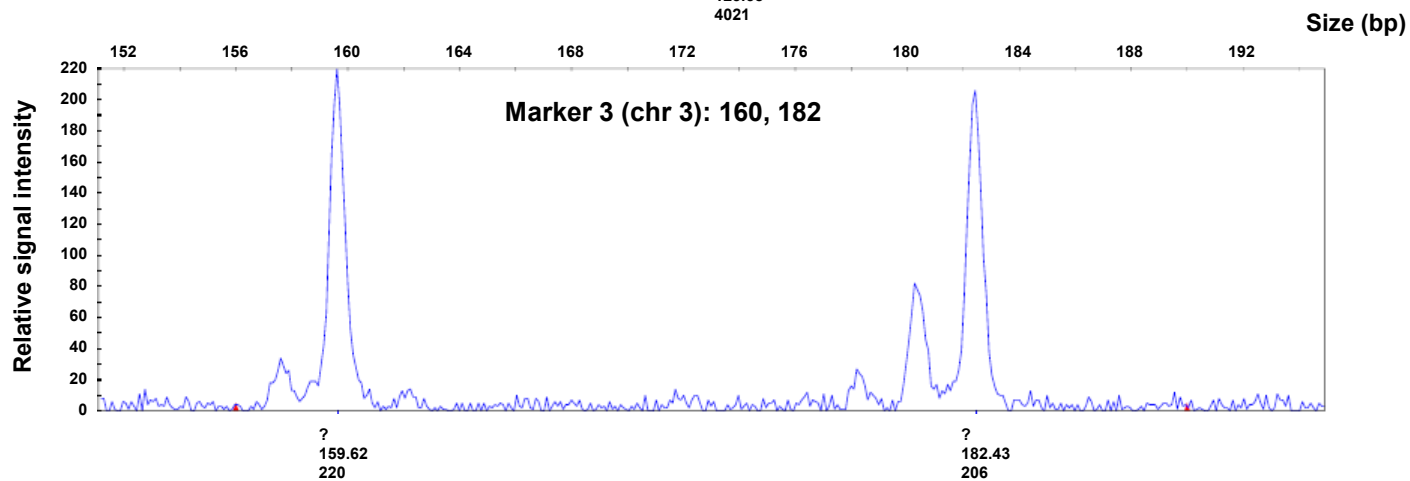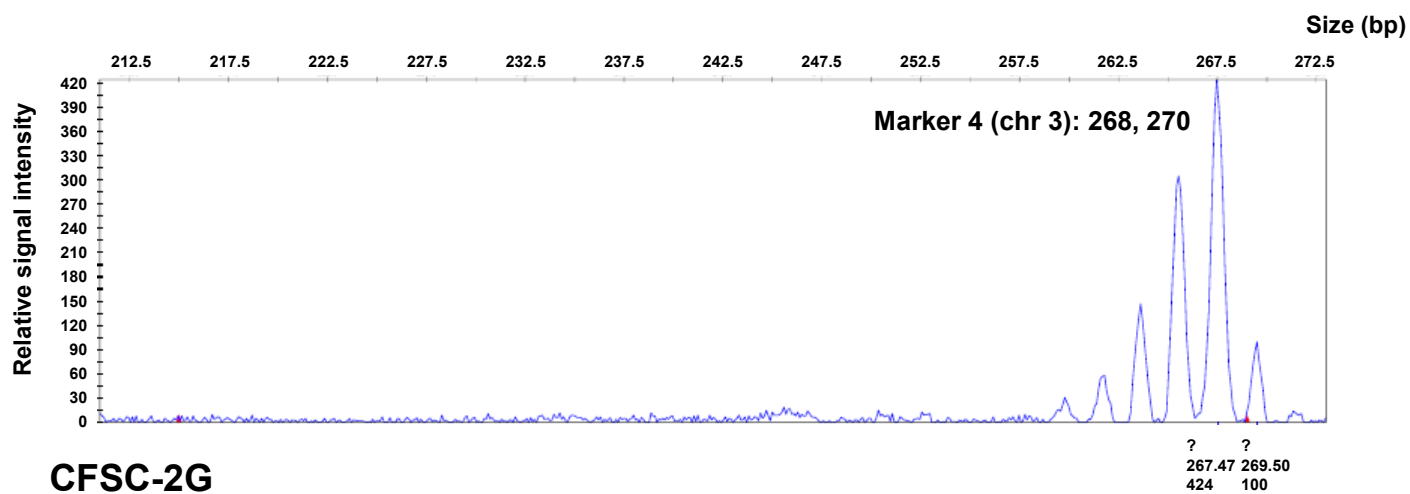

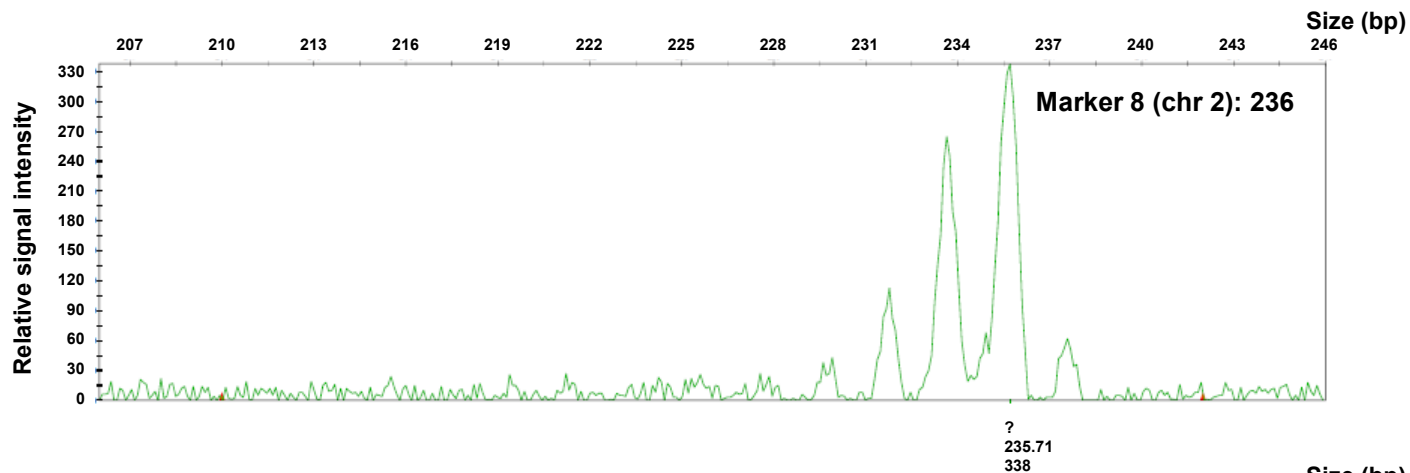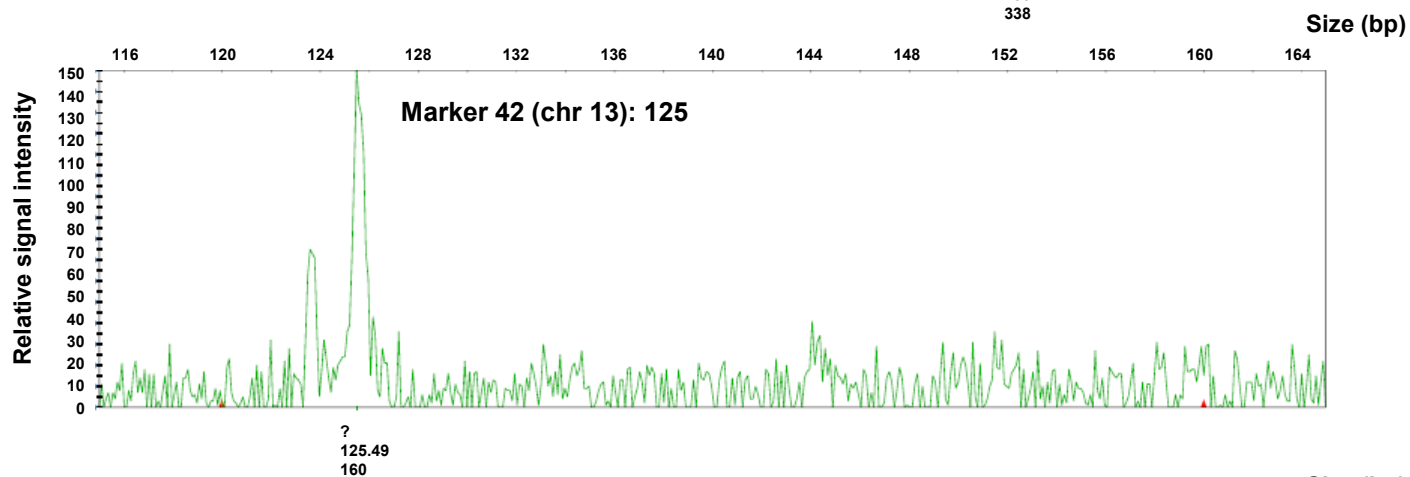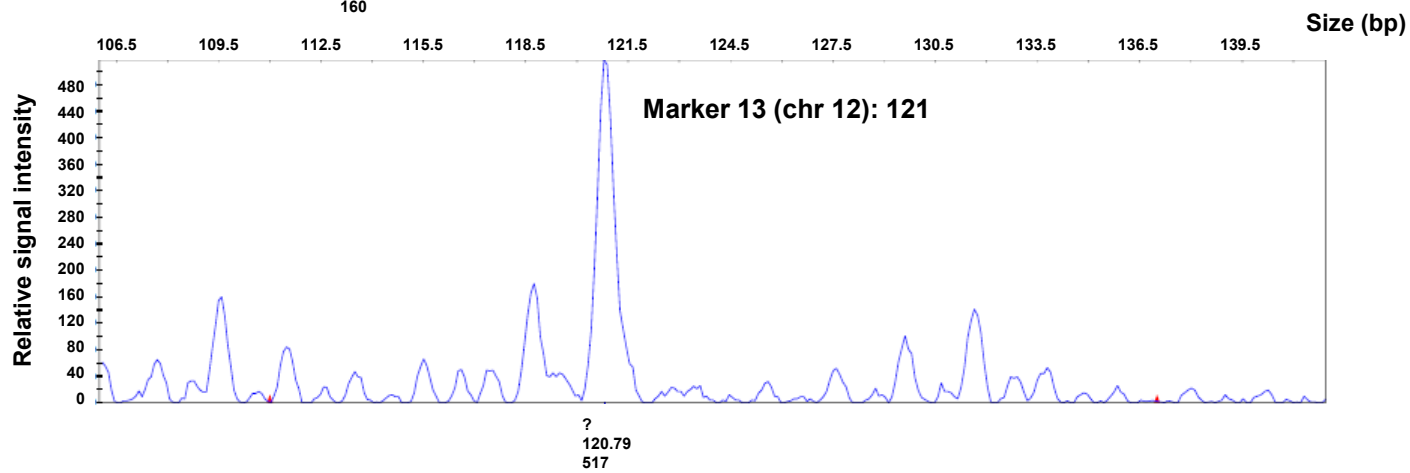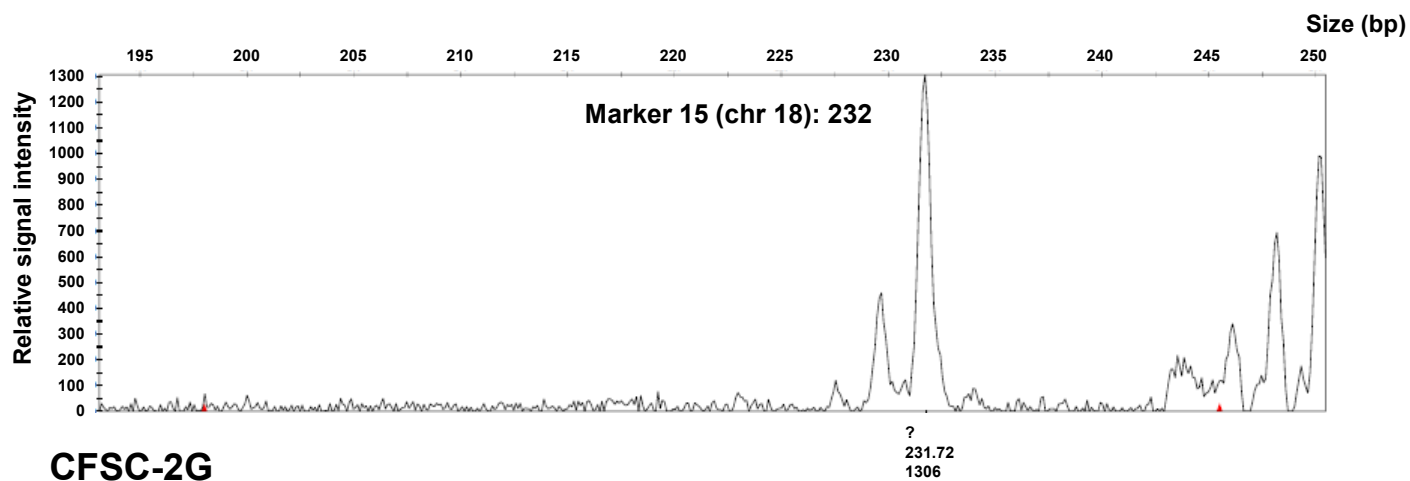

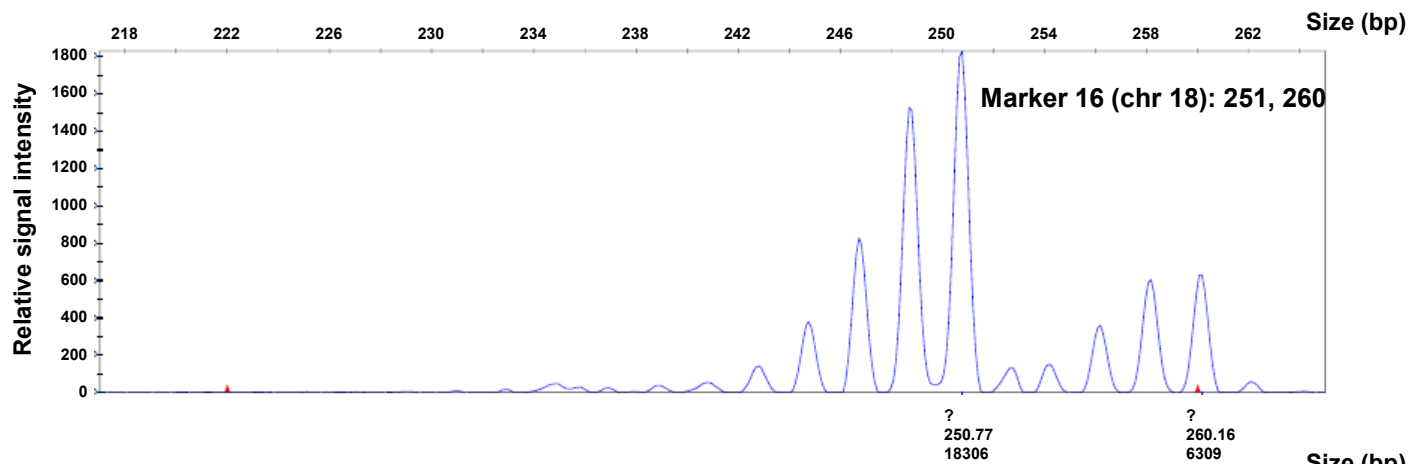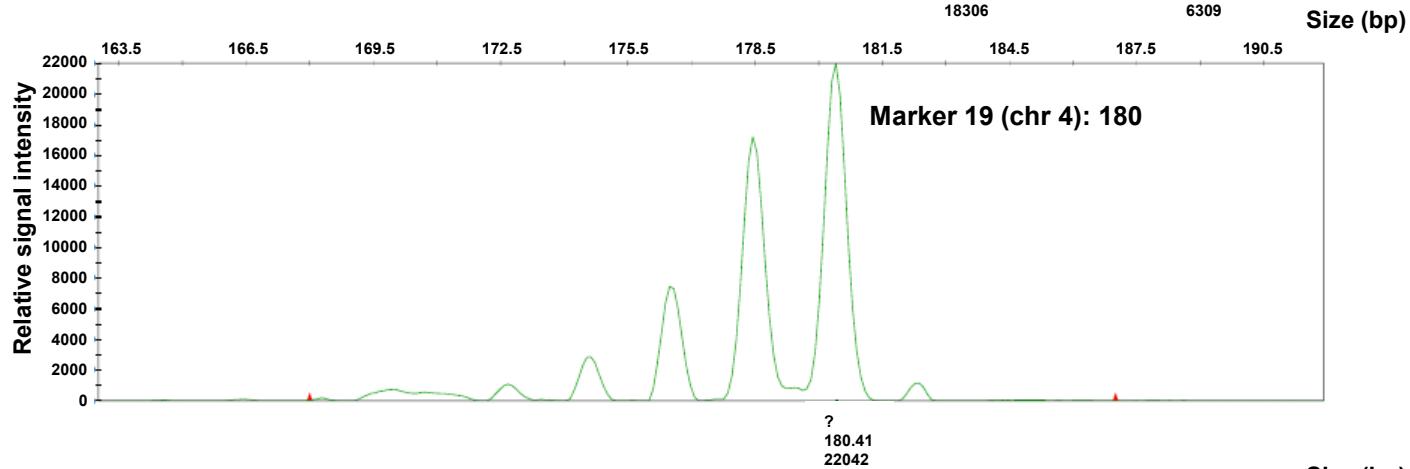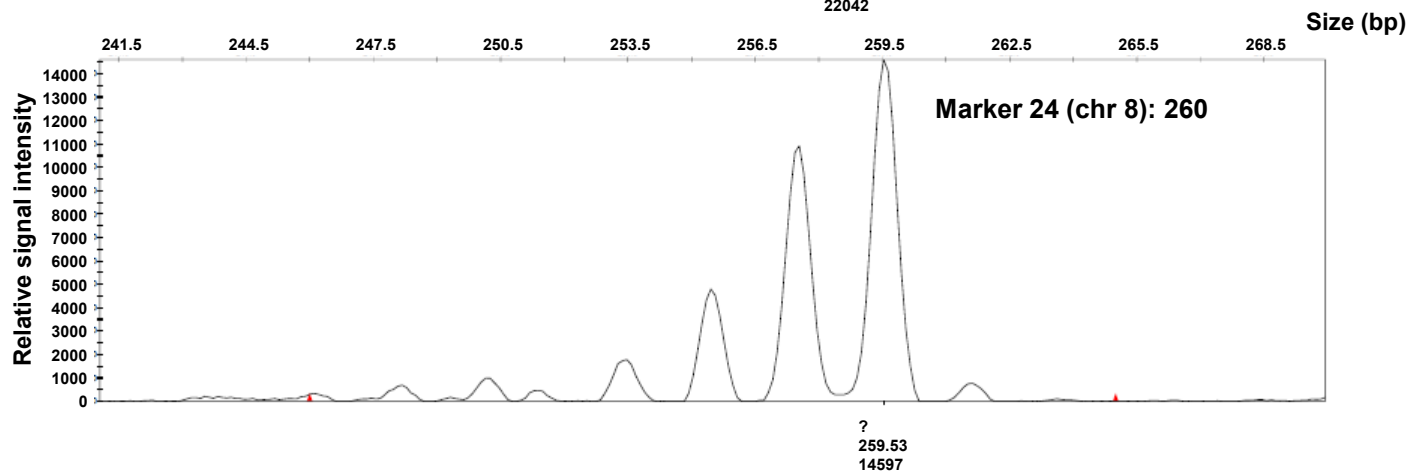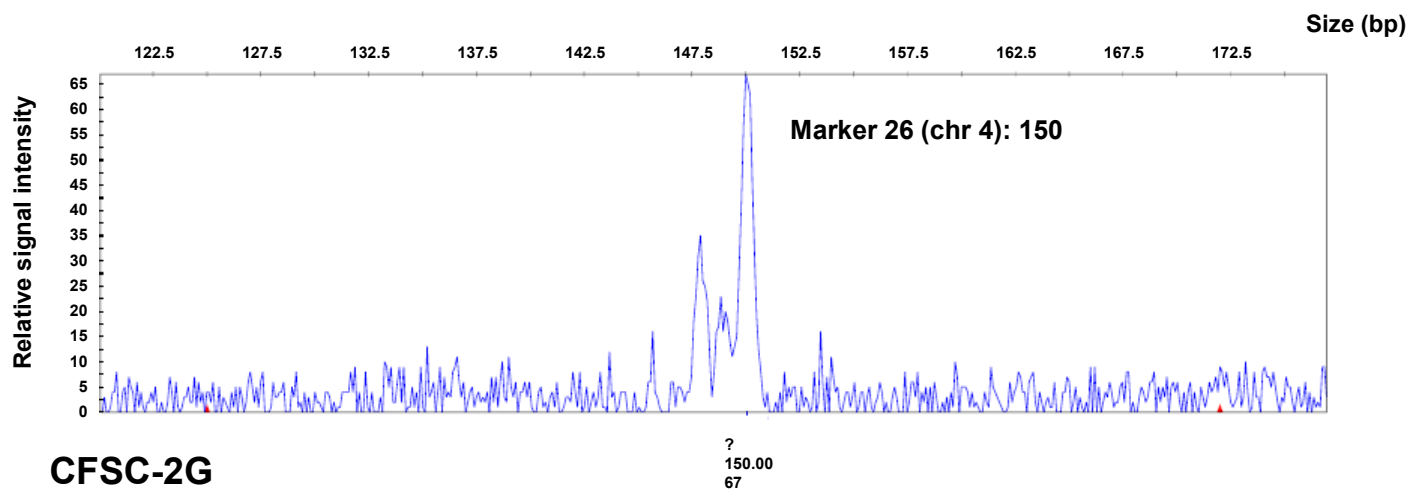

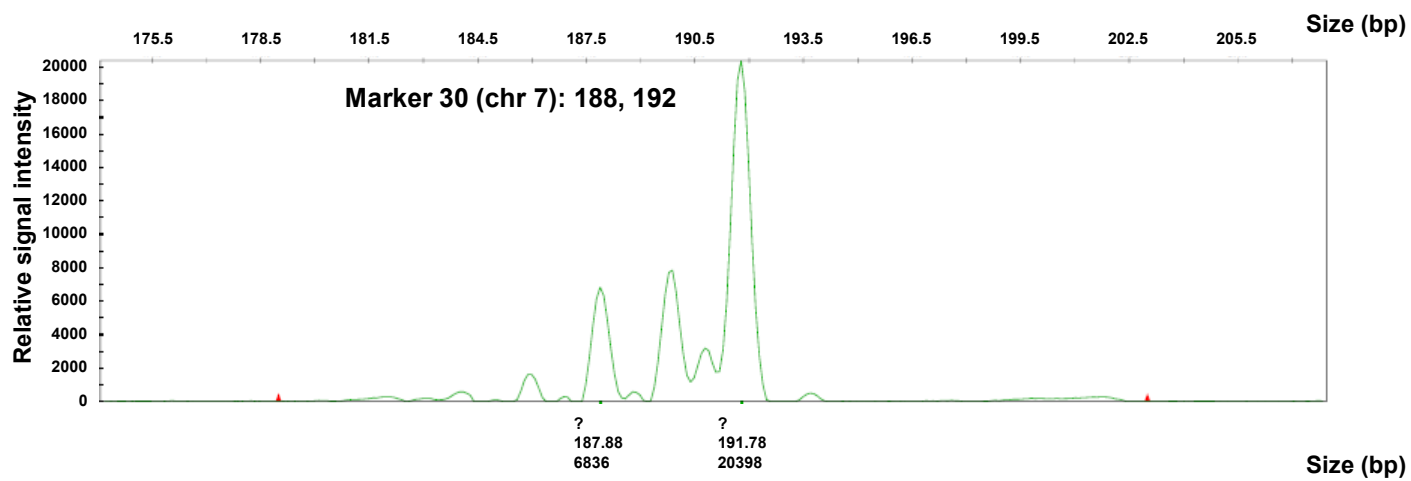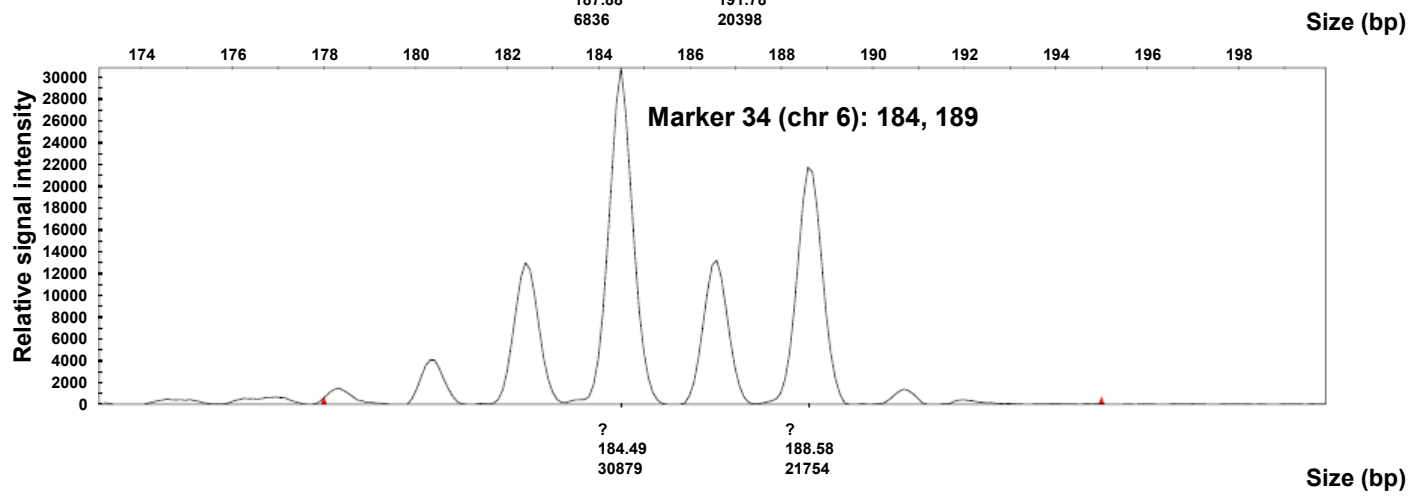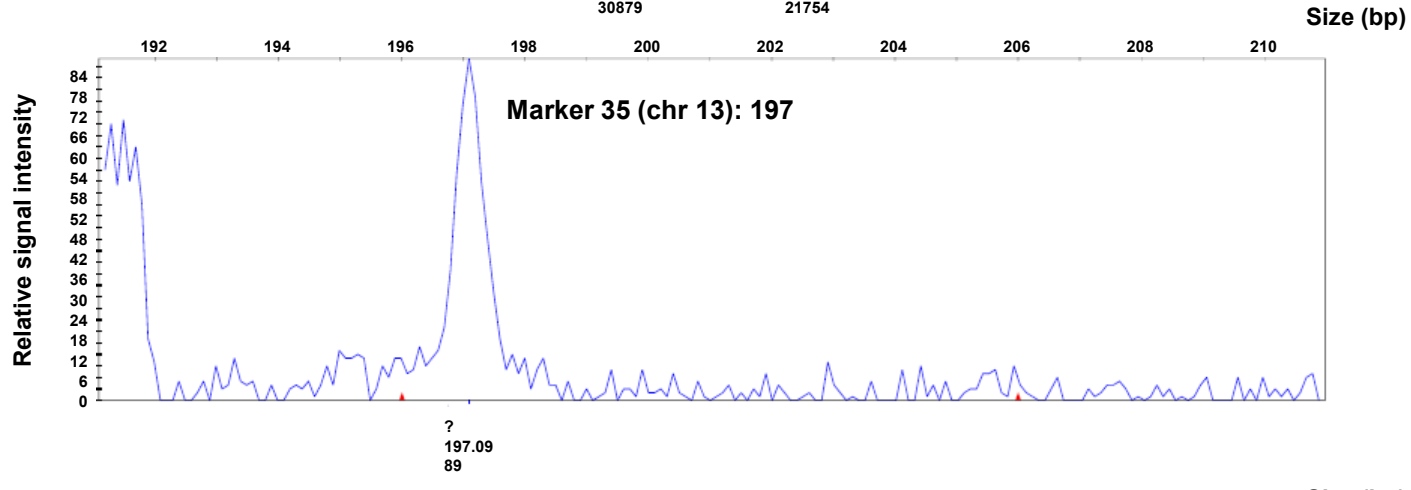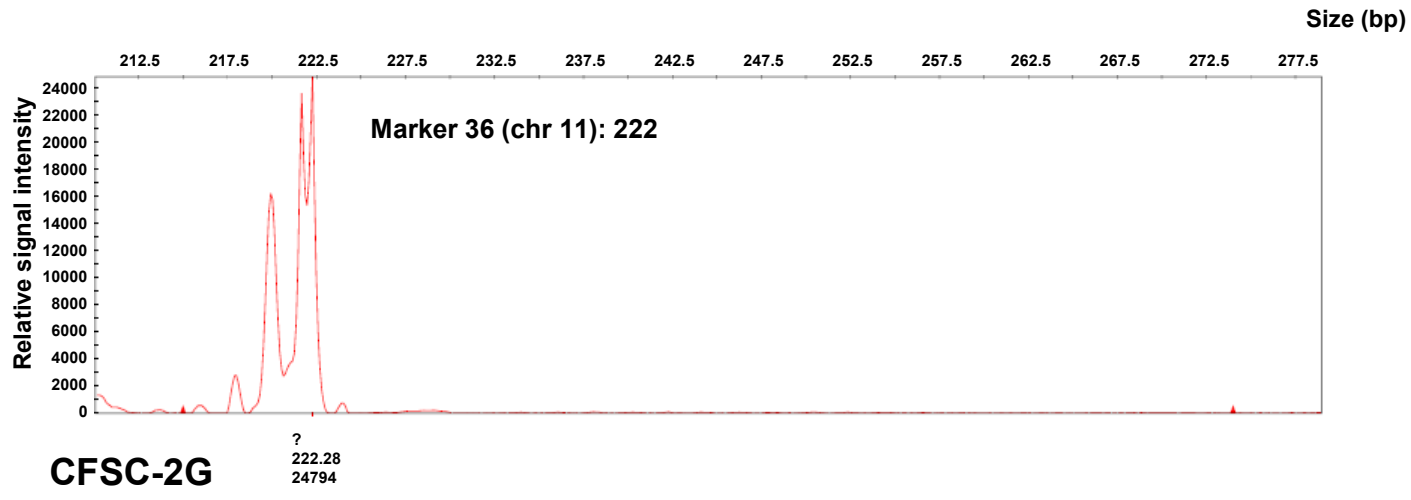

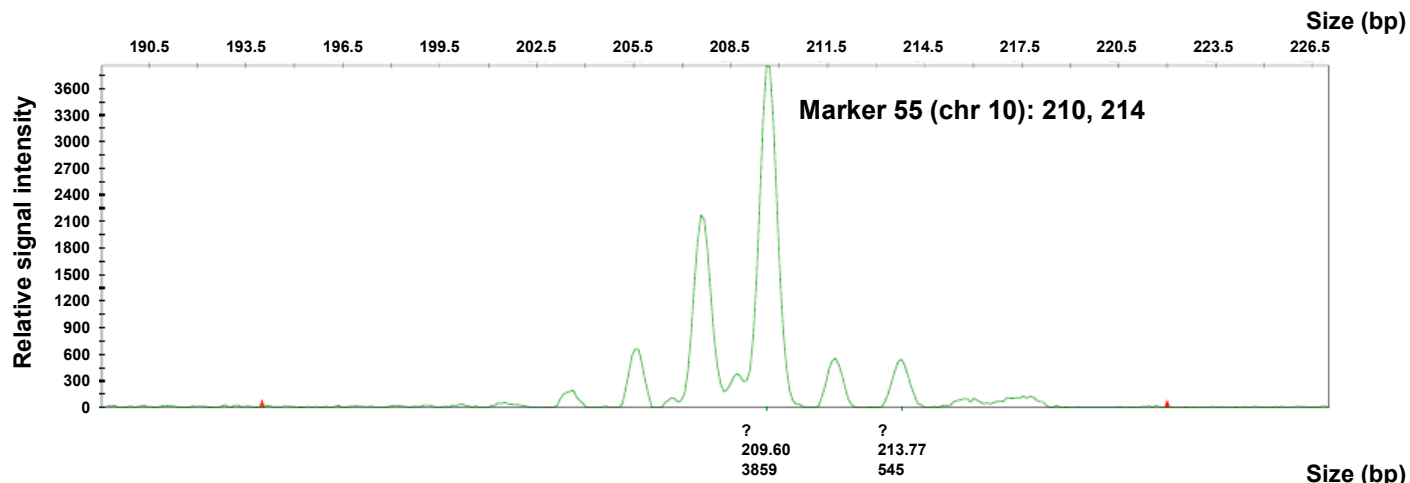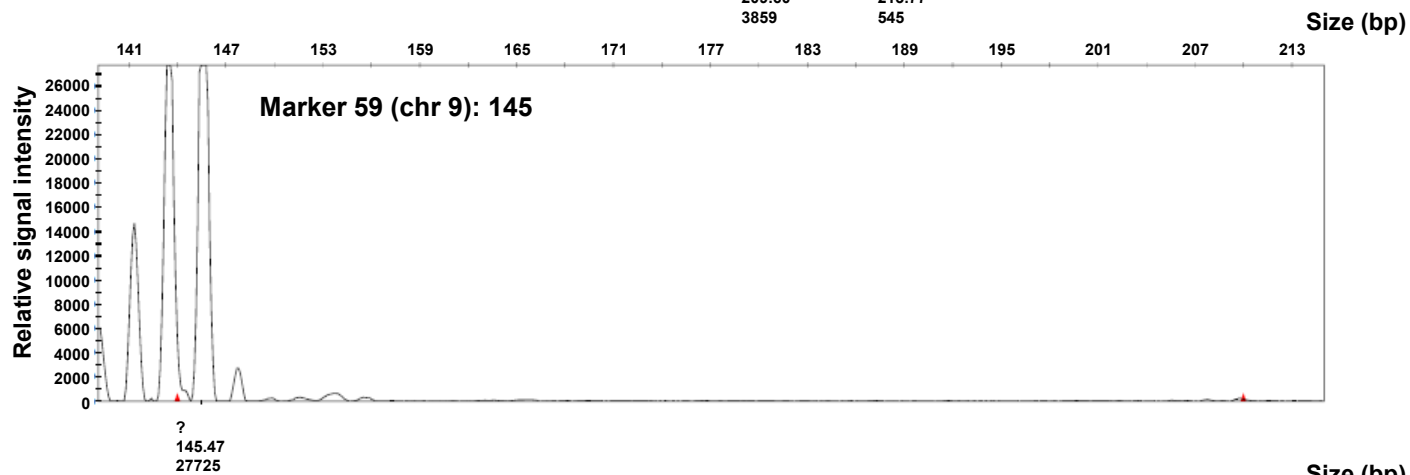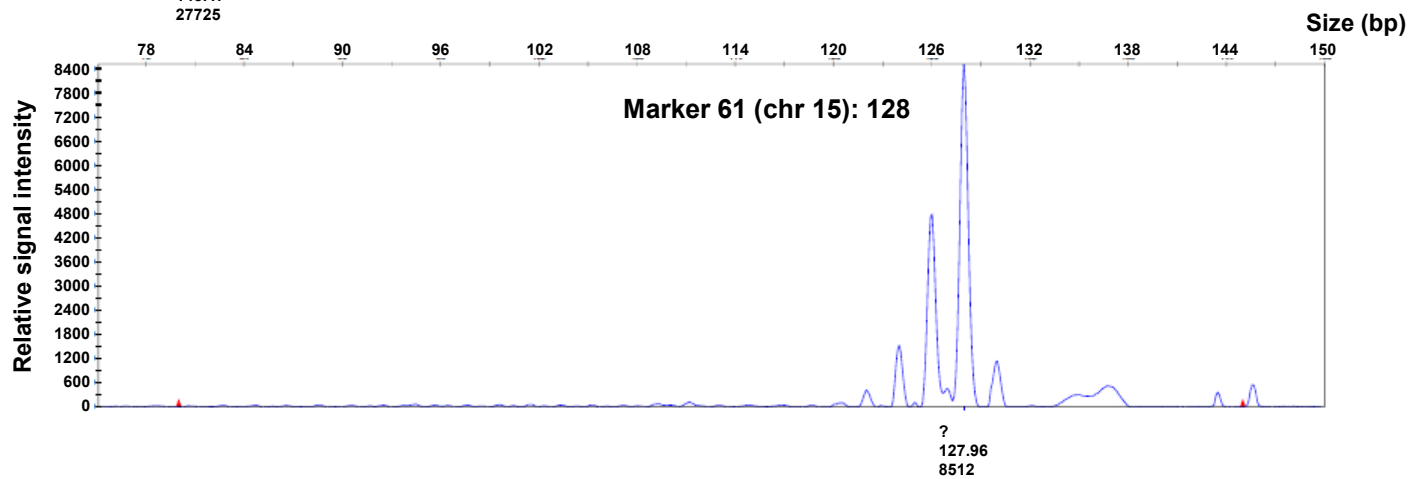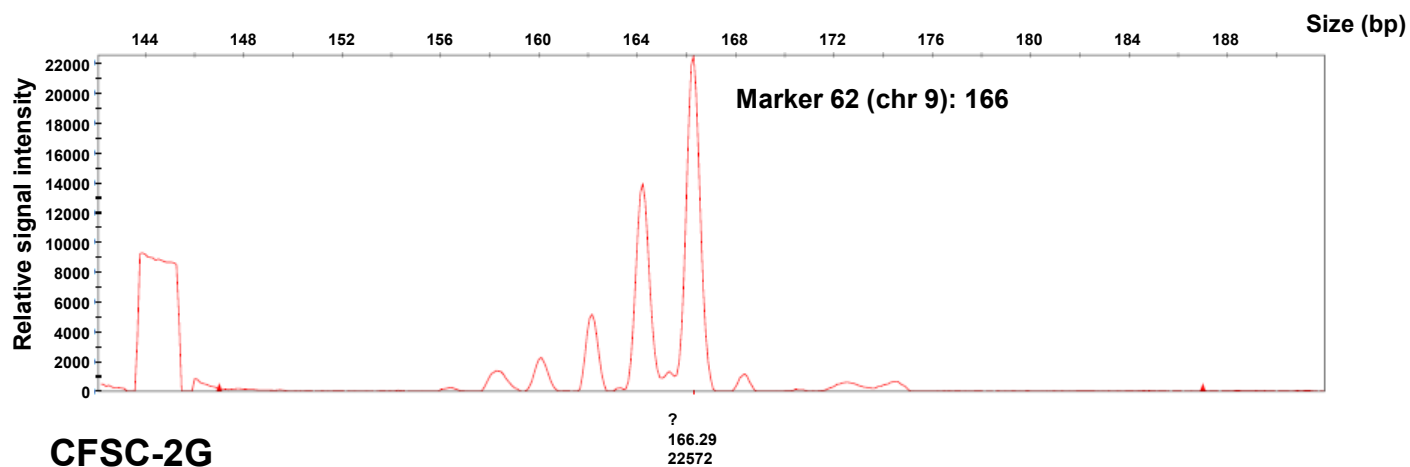

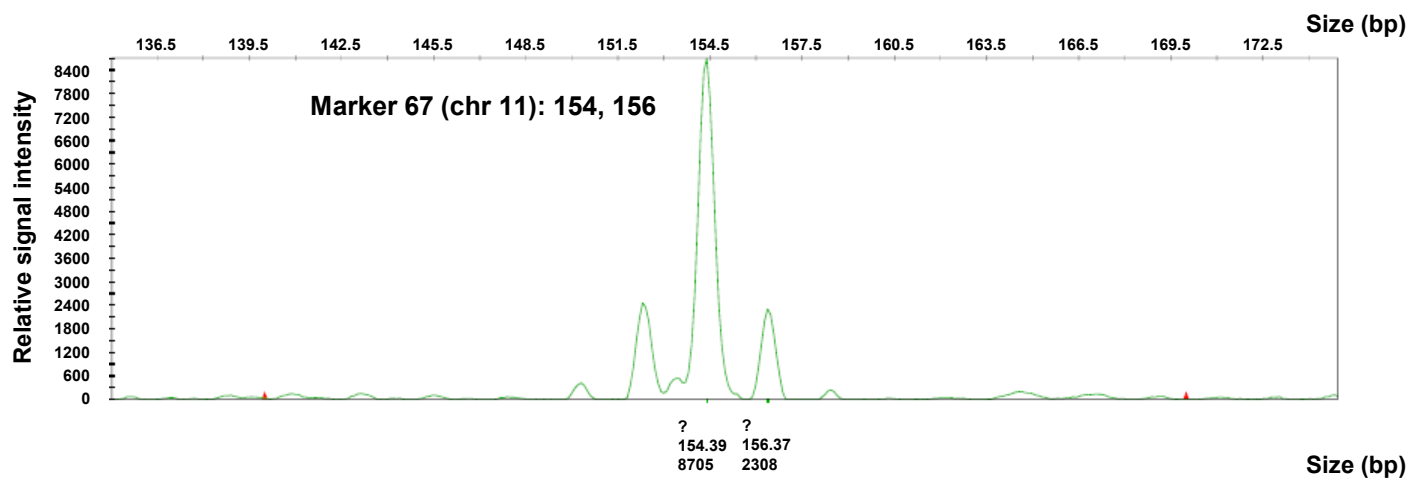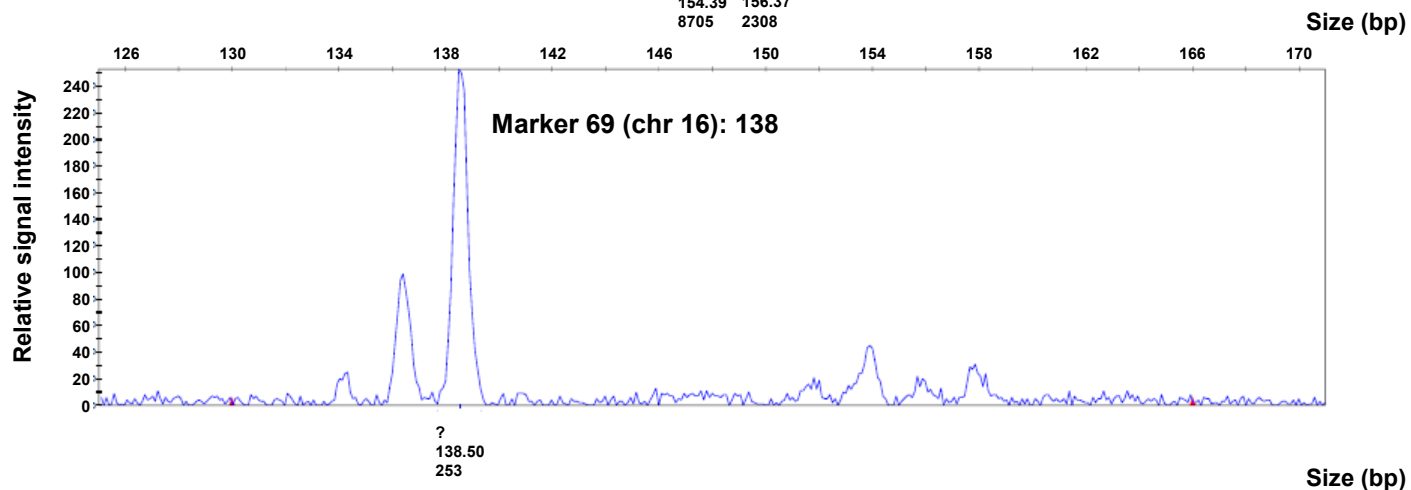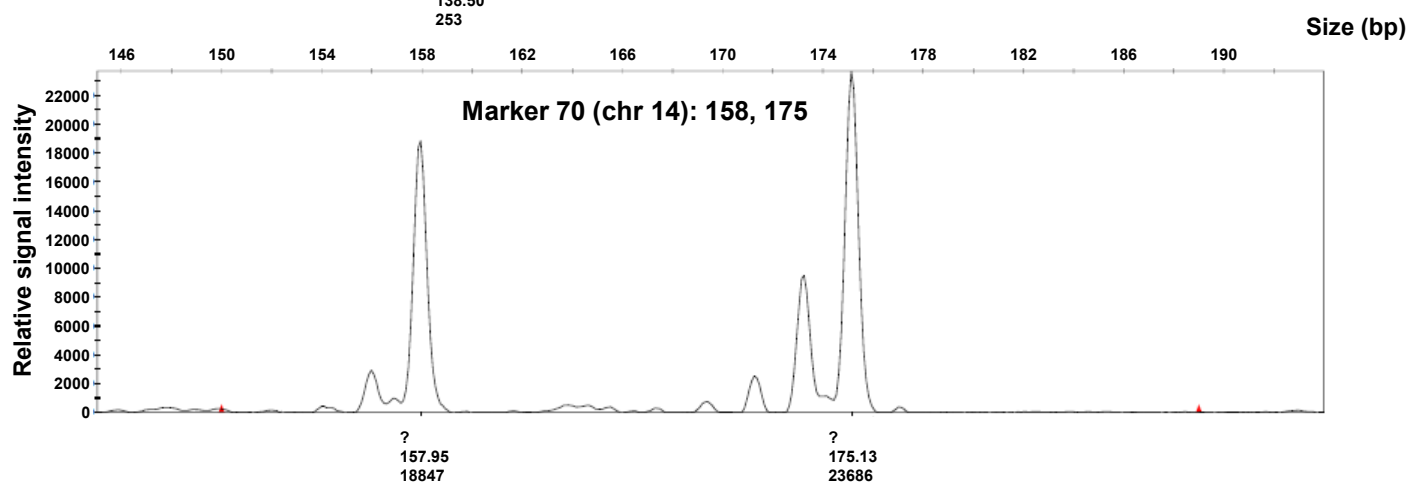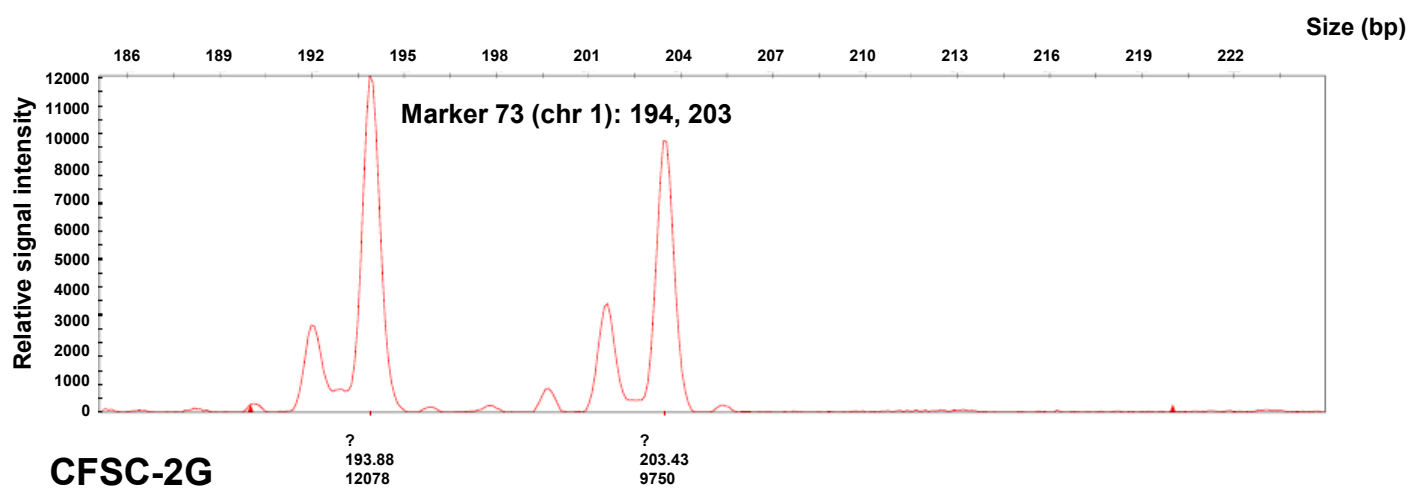

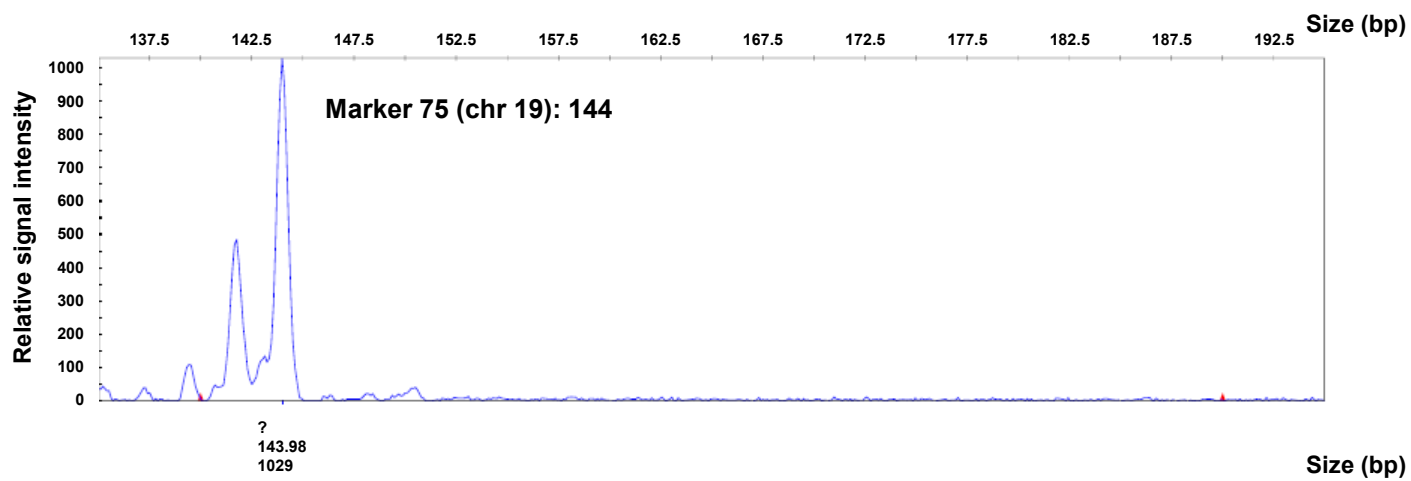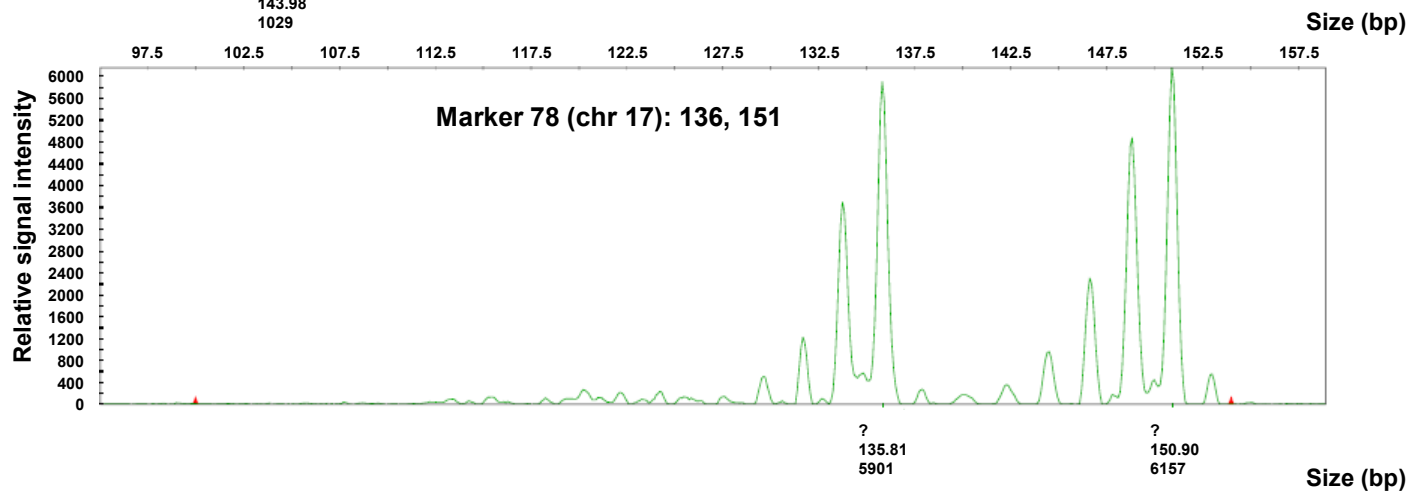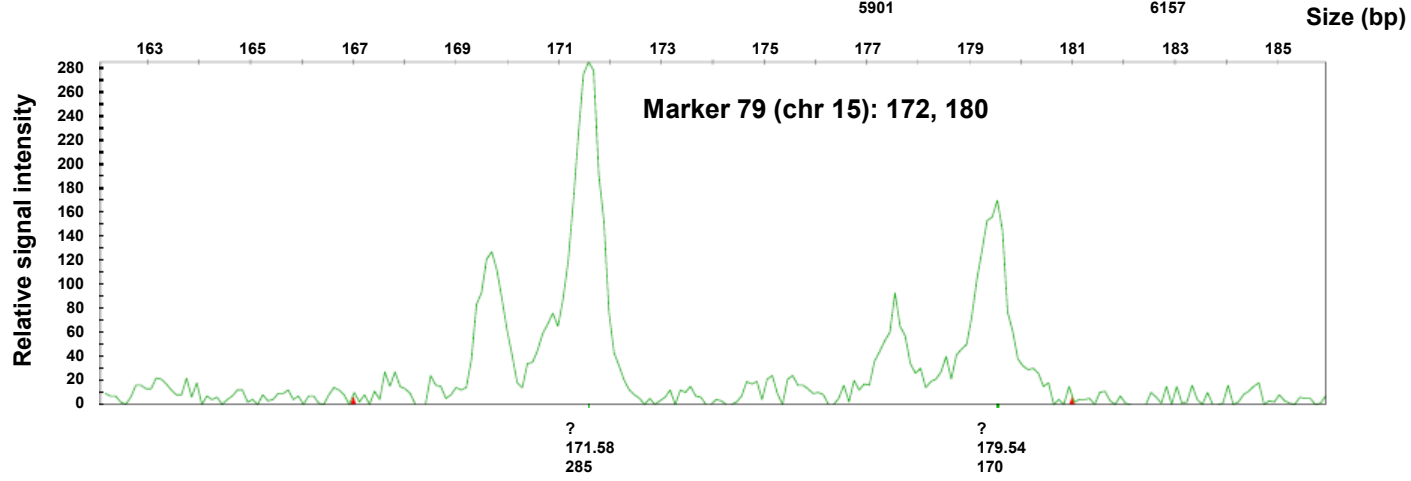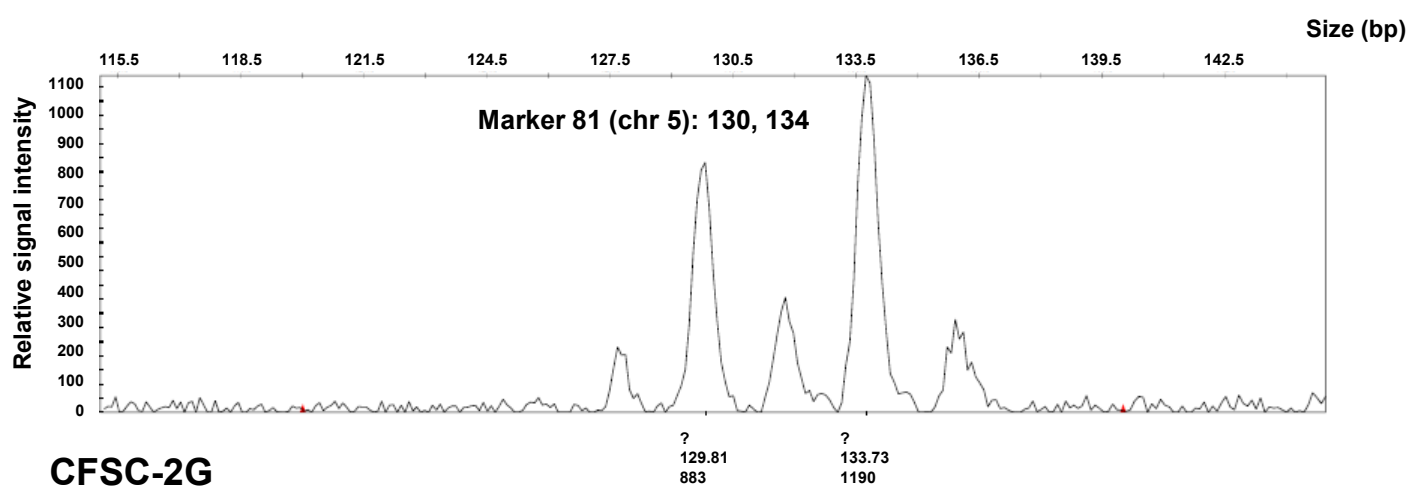

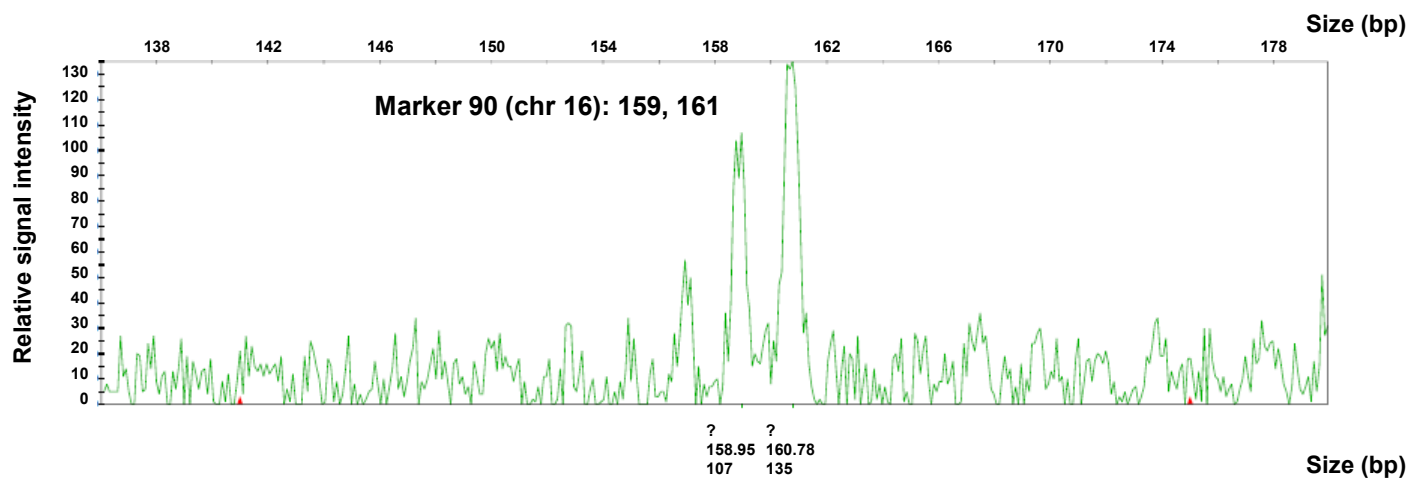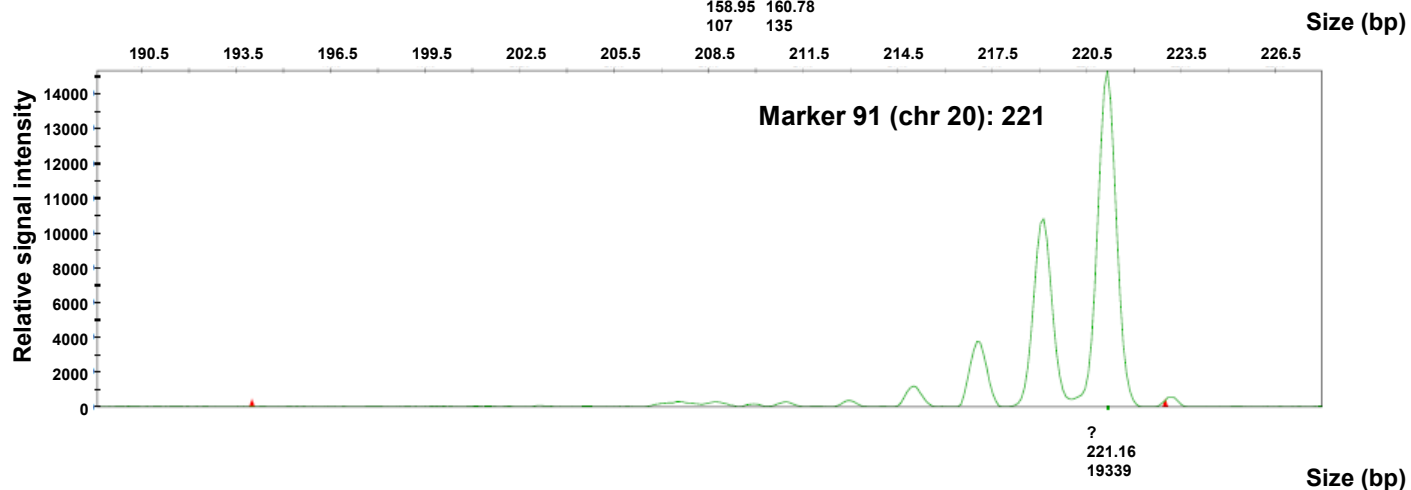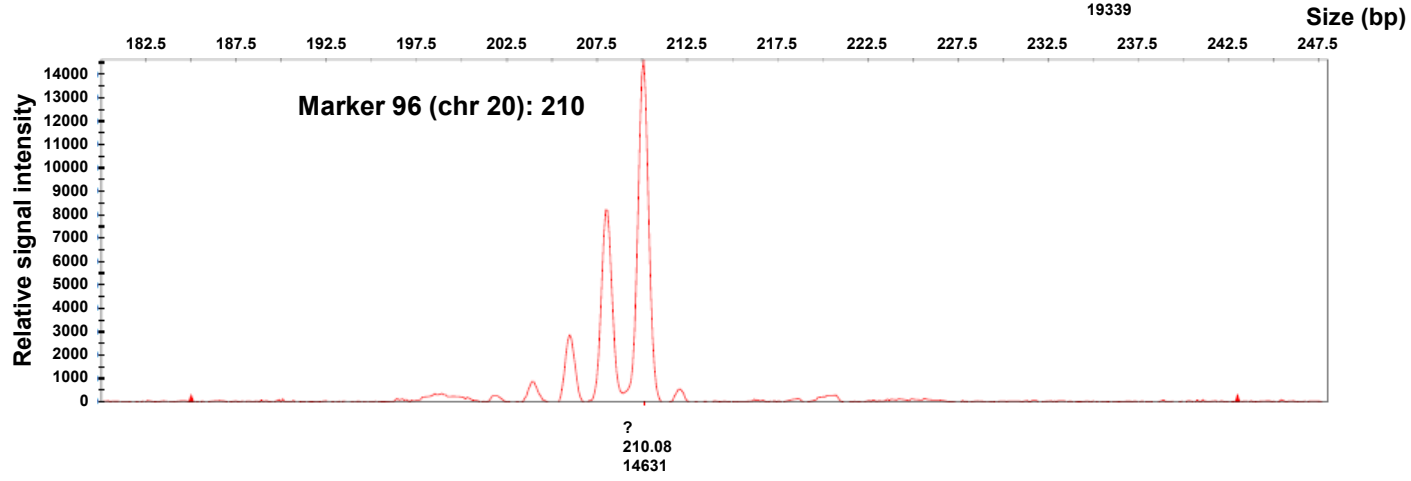

Supplement: s1 [file s1]
